# Supplementary material for: An organophosphorus-mediated cross-Rauhut–Currier/Wittig domino reaction for the efficient synthesis of trisubstituted cyclopentenes
Source: Royal Society of Chemistry journal article supplement (doi:10.1039/d1ob00150g), 2021-01-01

# Organophosphorus-Mediated cross-Rauhut– Currier/Wittig Domino Reaction for The Efficient Synthesis of Trisubstituted Cyclopentenes

Ya-Qiong Li,<sup>†,‡</sup> Guo-Dong Xu,<sup>†</sup> and Zhi-Zhen Huang\*,<sup>†</sup>

<sup>†</sup> Department of Chemistry, Zhejiang University, Hangzhou 310058, P.R. China

<sup>‡</sup> School of Chemistry and Chemical Engineering, Yangtze Normal University, Chongqing,  
408100, P.R. China

## Supporting Information

### Contents

|                                                                                |    |
|--------------------------------------------------------------------------------|----|
| 1. General Information.....                                                    | S2 |
| 2. Optimization of the Reaction Conditions.....                                | S2 |
| 3. X-ray Crystallographic Data of Trisubstituted Cyclopentene <b>3da</b> ....  | S3 |
| 4. <sup>1</sup> H NMR, <sup>13</sup> C NMR, HR-MS Spectra of New Products..... | S5 |

## 1. General Information

Unless otherwise indicated, all reagents were purchased from commercial distributors and used without further purification.  $^1\text{H}$  NMR and  $^{13}\text{C}$  NMR were recorded at 400 MHz and 100 MHz respectively, using tetramethylsilane as an internal reference. Mass spectroscopy data were collected on HRMS-EI, EI-MS instrument. Melting points were detected by a digital melting point apparatus and were uncorrected. Column chromatography was performed over silica gel 200-300.

## 2. Optimization of the Reaction Conditions

**Table S1.** Screening of Reaction Conditions.<sup>[a]</sup>

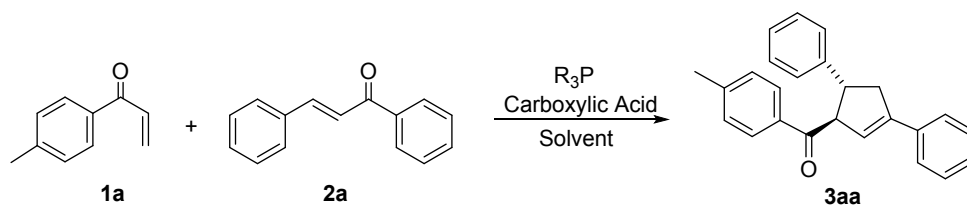

| Entry             | $\text{R}_3\text{P}$      | Carboxylic Acid                     | Solvent | T ( $^\circ\text{C}$ ) | Yield (%) <sup>[b]</sup> |
|-------------------|---------------------------|-------------------------------------|---------|------------------------|--------------------------|
| 1                 | $(n\text{-Bu})_3\text{P}$ | PivOH                               | dioxane | 100                    | 56                       |
| 2                 | $\text{Me}_3\text{P}$     | PivOH                               | dioxane | 100                    | 29                       |
| 3                 | $(t\text{-Bu})_3\text{P}$ | PivOH                               | dioxane | 100                    | 0                        |
| 4                 | $\text{Cy}_3\text{P}$     | PivOH                               | dioxane | 100                    | Trace                    |
| 5                 | $\text{Ph}_3\text{P}$     | PivOH                               | dioxane | 100                    | Trace                    |
| 6                 | $(n\text{-Bu})_3\text{P}$ | BzOH                                | dioxane | 100                    | 40                       |
| 7                 | $(n\text{-Bu})_3\text{P}$ | HOAc                                | dioxane | 100                    | 83                       |
| 8                 | $(n\text{-Bu})_3\text{P}$ | <i>p</i> - $\text{NO}_2\text{BzOH}$ | dioxane | 100                    | 0                        |
| 9 <sup>[c]</sup>  | $(n\text{-Bu})_3\text{P}$ | $(\text{CF}_3)_2\text{CHOH}$        | dioxane | 100                    | 68                       |
| 10                | $(n\text{-Bu})_3\text{P}$ | $(\text{CO}_2\text{H})_2$           | dioxane | 100                    | 0                        |
| 11 <sup>[d]</sup> | $(n\text{-Bu})_3\text{P}$ | HOAc                                | dioxane | 100                    | 61                       |

|                   |                                |      |                    |     |    |
|-------------------|--------------------------------|------|--------------------|-----|----|
| 12 <sup>[e]</sup> | ( <i>n</i> -Bu) <sub>3</sub> P | HOAc | dioxane            | 100 | 50 |
| 13 <sup>[f]</sup> | ( <i>n</i> -Bu) <sub>3</sub> P | -    | dioxane            | 100 | 0  |
| 14                | ( <i>n</i> -Bu) <sub>3</sub> P | HOAc | toluene            | 100 | 76 |
| 15                | ( <i>n</i> -Bu) <sub>3</sub> P | HOAc | DME                | 100 | 0  |
| 16                | ( <i>n</i> -Bu) <sub>3</sub> P | HOAc | CH <sub>3</sub> CN | 100 | 0  |
| 17                | ( <i>n</i> -Bu) <sub>3</sub> P | HOAc | DMF                | 100 | 0  |
| 18                | ( <i>n</i> -Bu) <sub>3</sub> P | HOAc | dioxane            | 90  | 47 |
| 19                | ( <i>n</i> -Bu) <sub>3</sub> P | HOAc | dioxane            | 110 | 66 |

[a] The mixture of **1a** (0.1 mmol), **2a** (0.2 mmol), phosphine (100 mol %), and acid (2.0 equiv.) was stirred in solvent (2 mL) at 100 °C for 48h under N<sub>2</sub> (1 atm). [b] Isolated yield. [c] Dioxane/(CF<sub>3</sub>)<sub>2</sub>CHOH (35/1, 1.5 mL) [d] 1.0 equiv. HOAc. [e] 3.0 equiv. HOAc. [f] Major product is **5a** and minor product is **4a**.

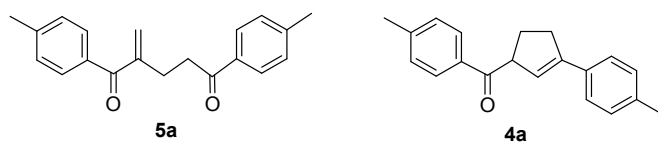

### 3. X-ray Crystallographic Data of Trisubstituted Cyclopentene **3da**

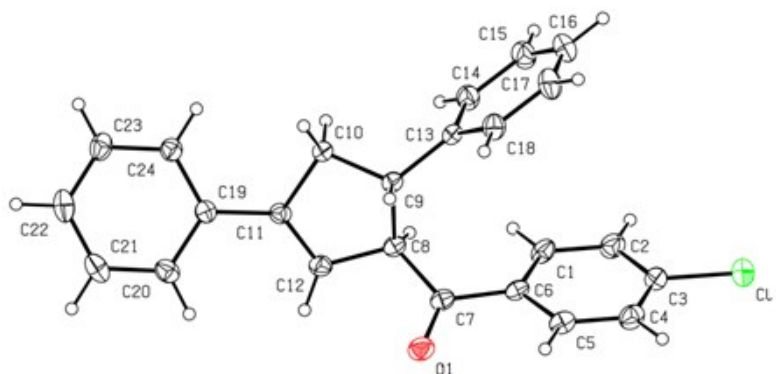

## Datablock: 200715\_3da\_0m

---

Bond precision: C-C = 0.0019 A                      Wavelength=0.71073

Cell:                      a=7.972(3)                      b=9.389(3)                      c=13.279(5)  
                                    alpha=85.406(17)                      beta=84.165(19)                      gamma=67.620(18)

Temperature: 170 K

|                | Calculated   | Reported     |
|----------------|--------------|--------------|
| Volume         | 913.4(6)     | 913.3(6)     |
| Space group    | P -1         | P -1         |
| Hall group     | -P 1         | -P 1         |
| Moiety formula | C24 H19 Cl O | C24 H19 Cl O |
| Sum formula    | C24 H19 Cl O | C24 H19 Cl O |
| Mr             | 358.84       | 358.84       |
| Dx, g cm-3     | 1.305        | 1.305        |
| Z              | 2            | 2            |
| Mu (mm-1)      | 0.219        | 0.219        |
| F000           | 376.0        | 376.0        |
| F000'          | 376.44       |              |
| h,k,lmax       | 10,12,17     | 10,12,17     |
| Nref           | 4031         | 4019         |
| Tmin,Tmax      | 0.927,0.951  | 0.717,0.746  |
| Tmin'          | 0.904        |              |

Correction method= # Reported T Limits: Tmin=0.717 Tmax=0.746  
AbsCorr = MULTI-SCAN

Data completeness= 0.997                      Theta(max)= 27.113

R(reflections)= 0.0372( 3609)                      wR2(reflections)= 0.0972( 4019)

S = 1.047                      Npar= 235

CCDC 2022239 contains the supplementary crystallographic data for **3da**. These data can be obtained free of charge from The Cambridge Crystallographic Data Centre via [www.ccdc.cam.ac.uk/ data\\_request/cif](http://www.ccdc.cam.ac.uk/data_request/cif)

#### 4. <sup>1</sup>H NMR, <sup>13</sup>C NMR, HR-MS Spectra of New Products

<sup>1</sup>H NMR Spectrum of (3,5-diphenylcyclopent-2-en-1-yl)(4-tolyl) methanone **3aa**

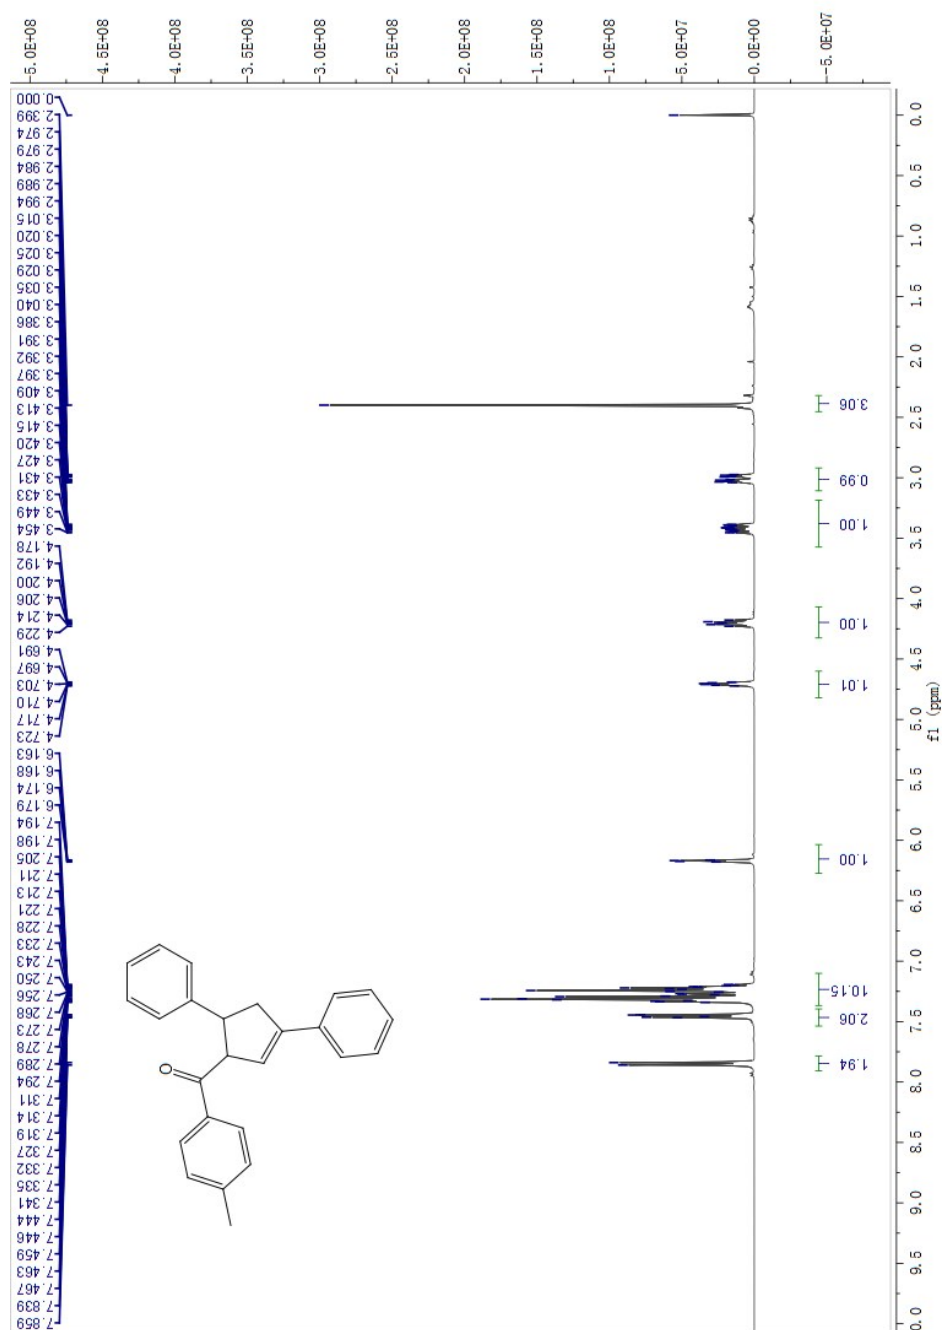

$^{13}\text{C}$  NMR Spectrum of (3,5-diphenylcyclopent-2-en-1-yl)(4-tolyl) methanone **3aa**

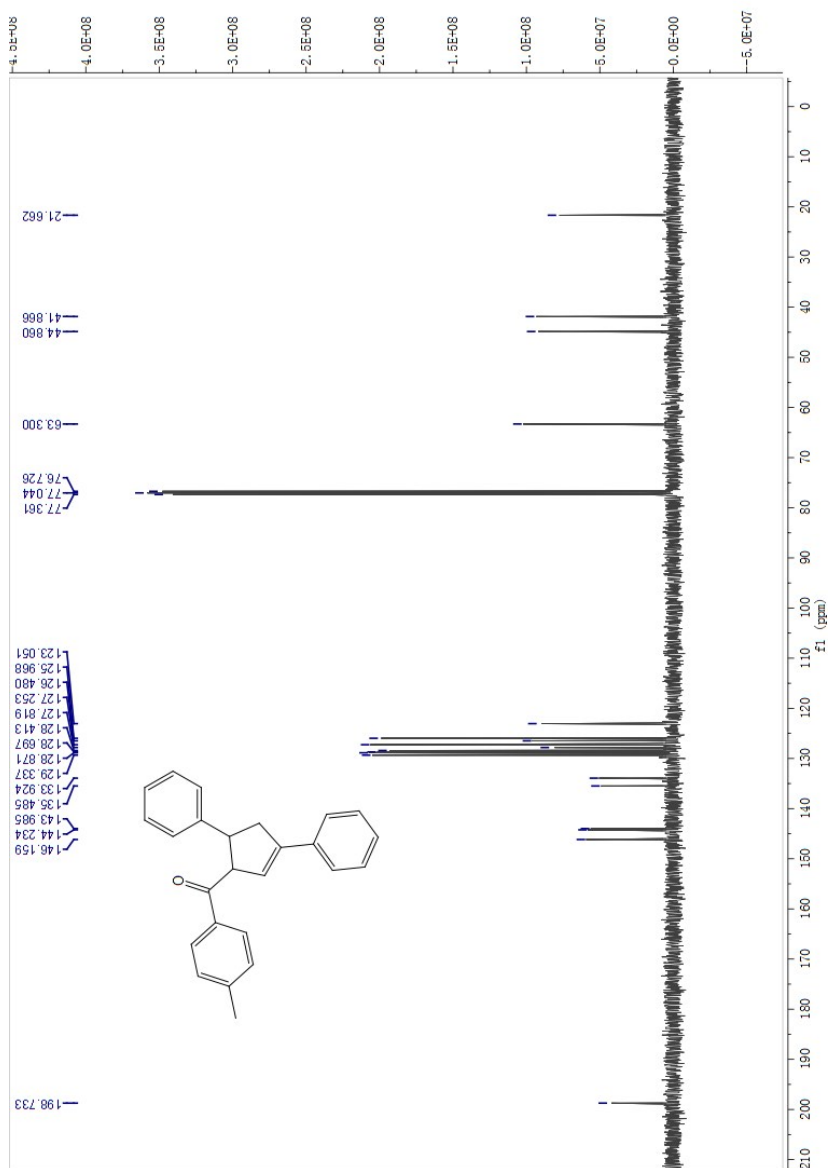

HR-MS Spectrum of (3,5-diphenylcyclopent-2-en-1-yl)(4-tolyl) methanone **3aa**

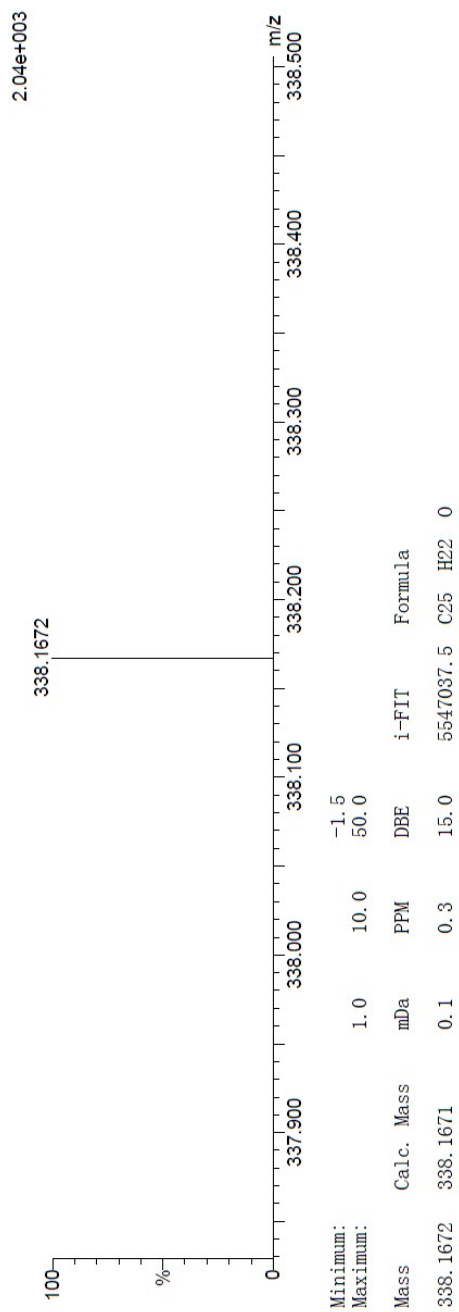

$^1\text{H}$  NMR Spectrum of (3,5-diphenylcyclopent-2-en-1-yl) (4-methoxyphenyl) methanone **3ba**

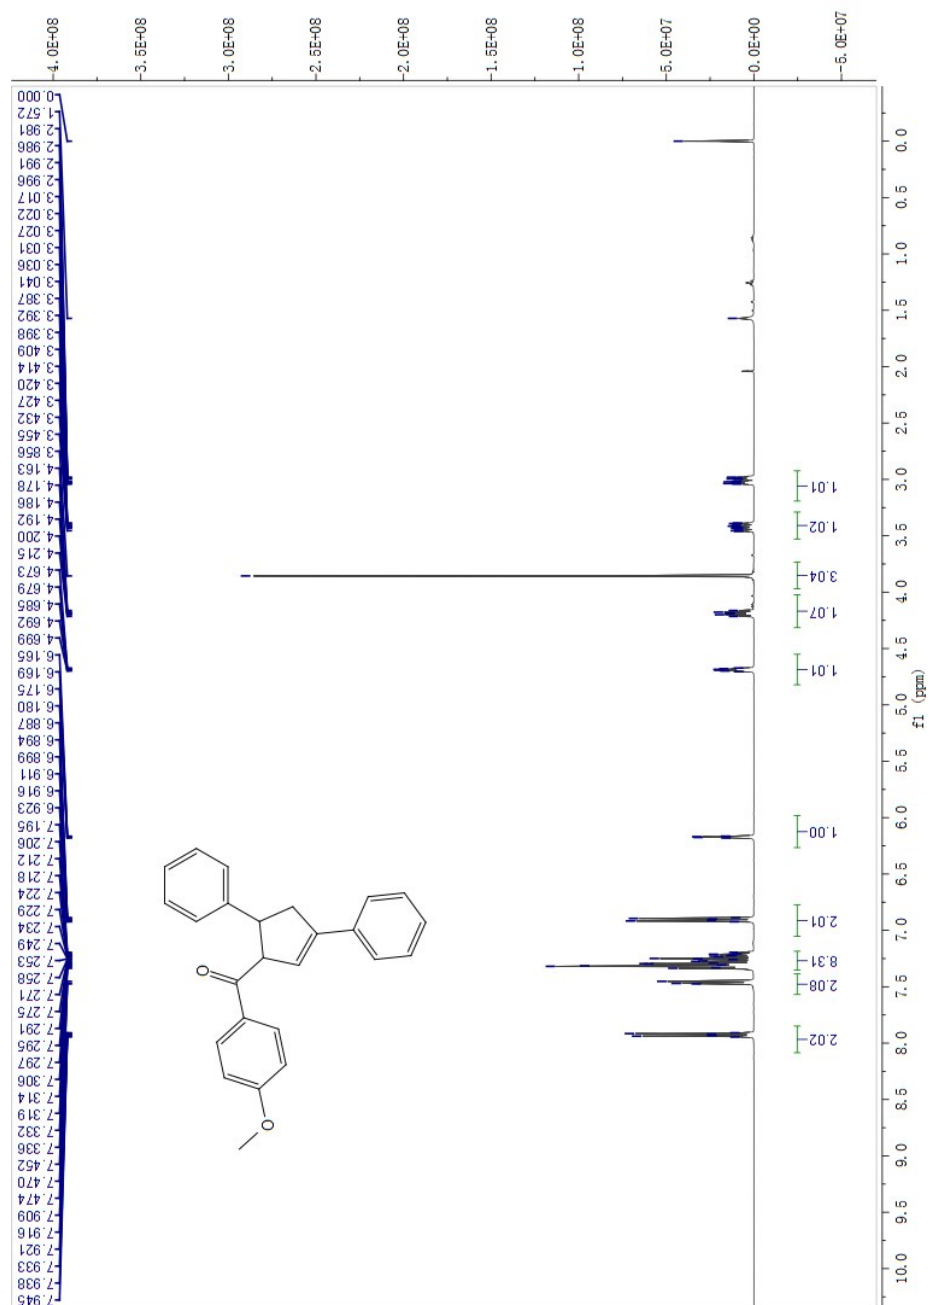



$^{13}\text{C}$  NMR Spectrum of (3,5-diphenylcyclopent-2-en-1-yl)(4-methoxyphenyl) methanone **3ba**

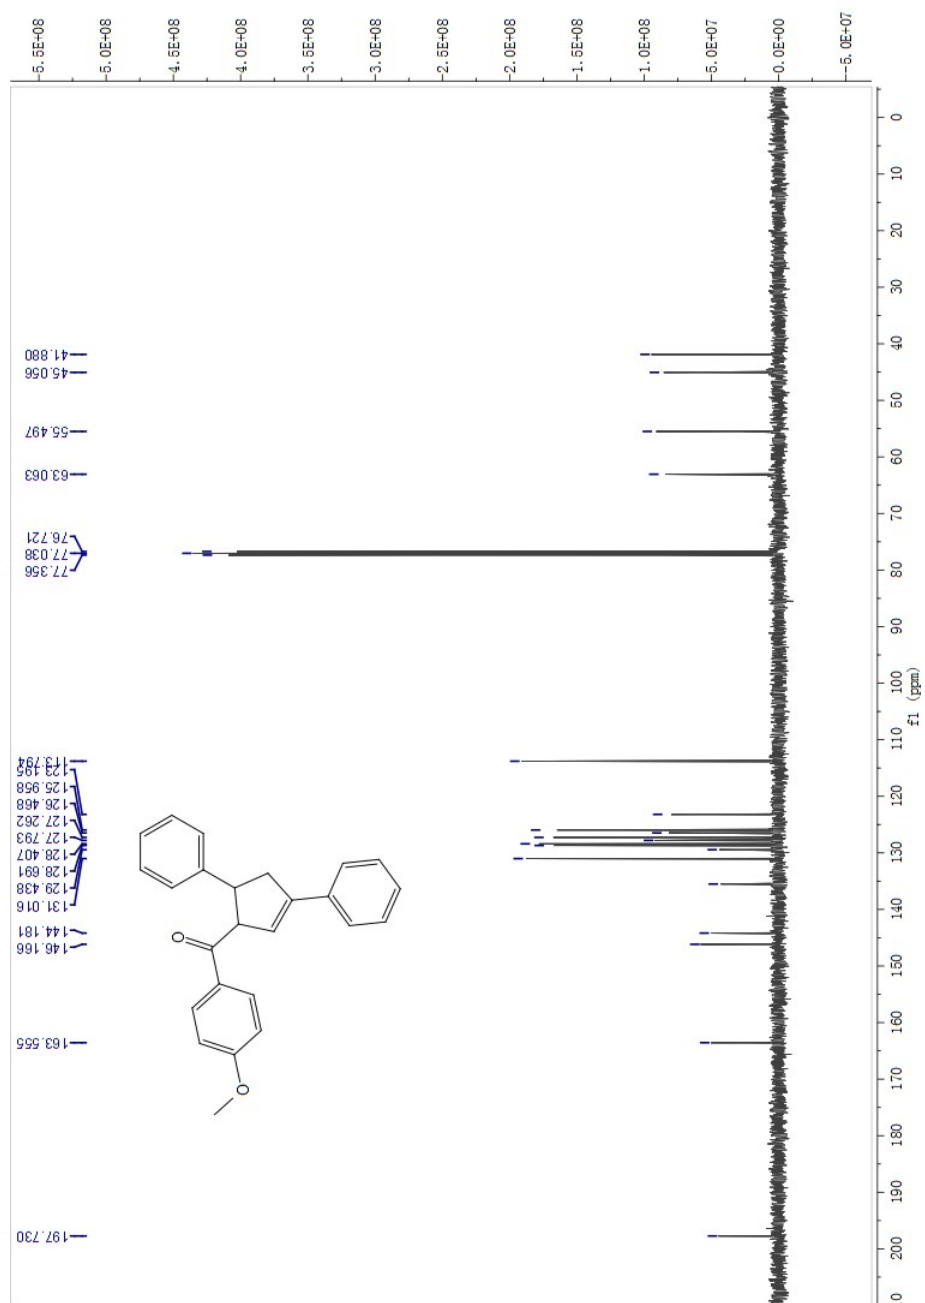

HR-MS Spectrum of (3,5-diphenylcyclopent-2-en-1-yl)(4-methoxyphenyl) methanone **3ba**

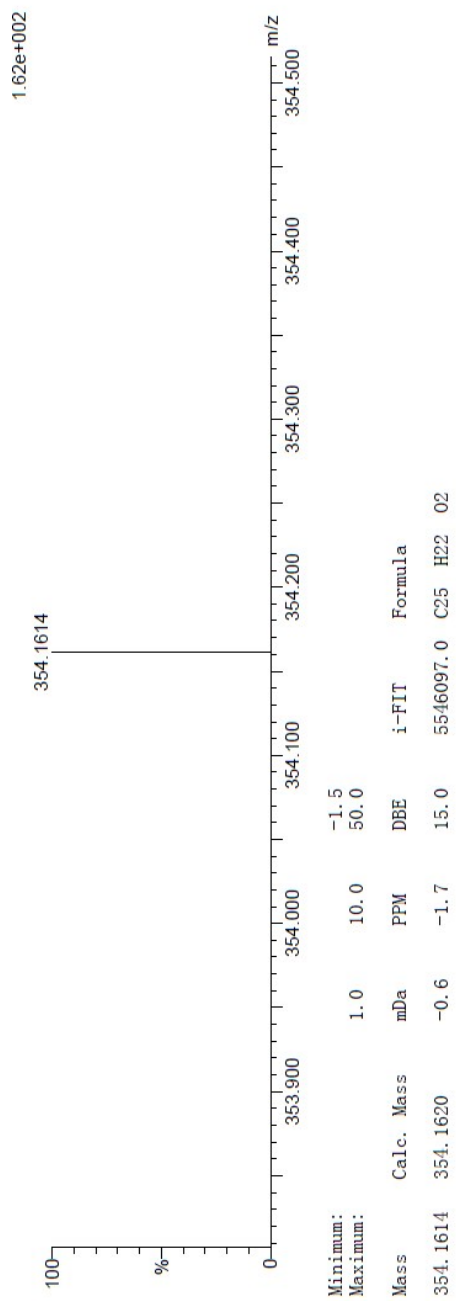



<sup>13</sup>C NMR Spectrum of (3,5-diphenylcyclopent-2-en-1-yl)(4-fluorophenyl) methanone **3ca**

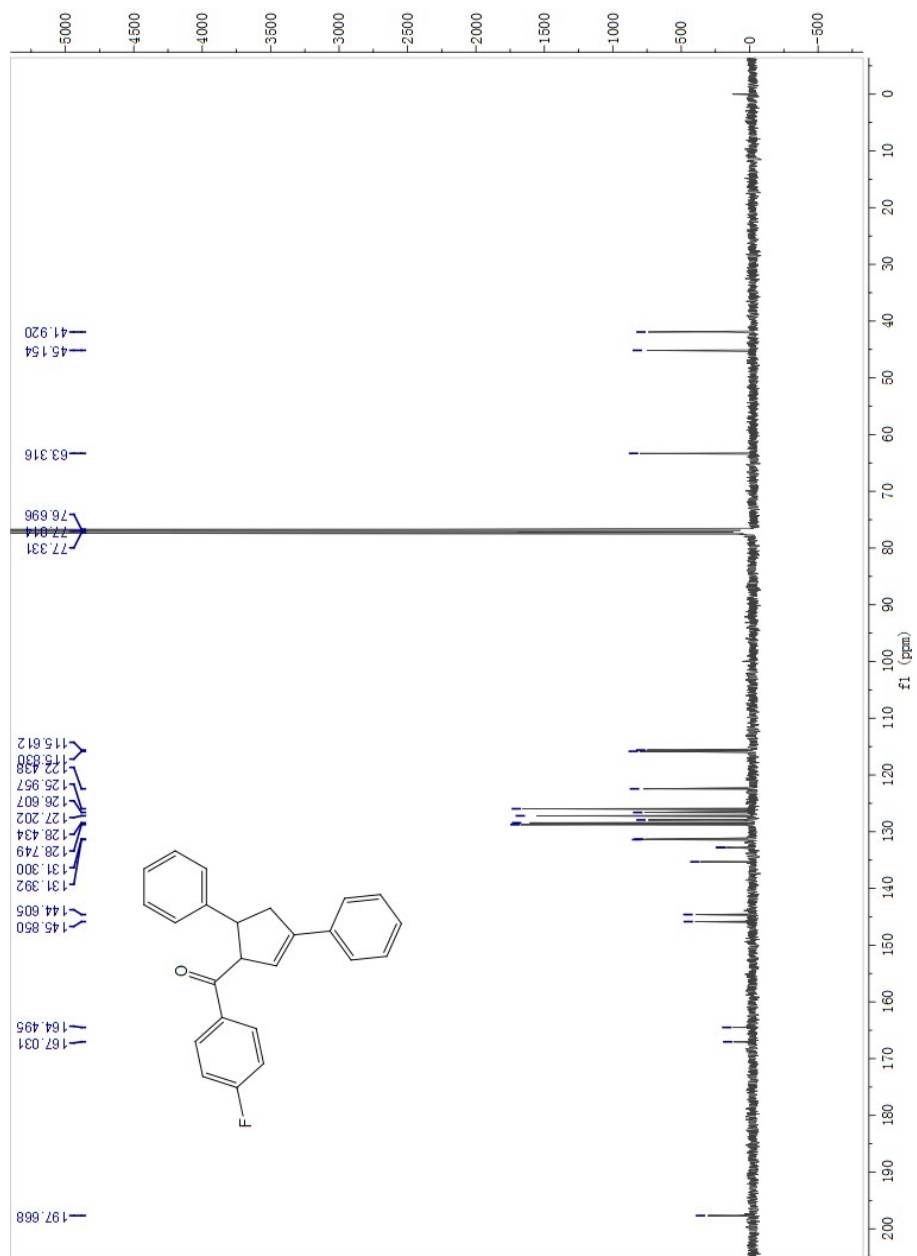

HR-MS Spectrum of (3,5-diphenylcyclopent-2-en-1-yl)(4-fluorophenyl) methanone **3ca**

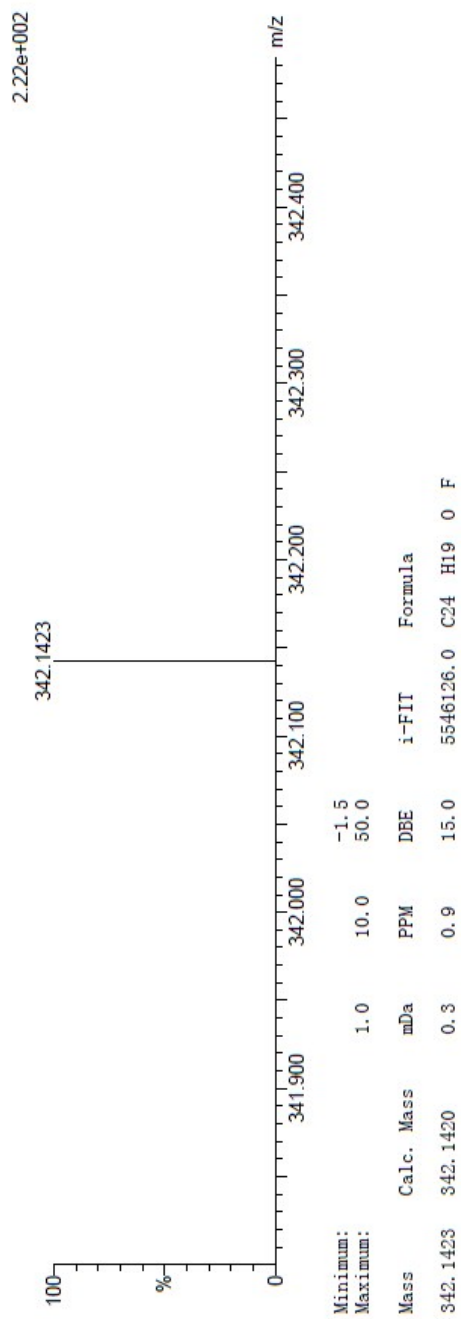

<sup>1</sup>H NMR Spectrum of (4-chlorophenyl)(3,5-diphenylcyclopent-2-en-1-yl) methanone **3da**

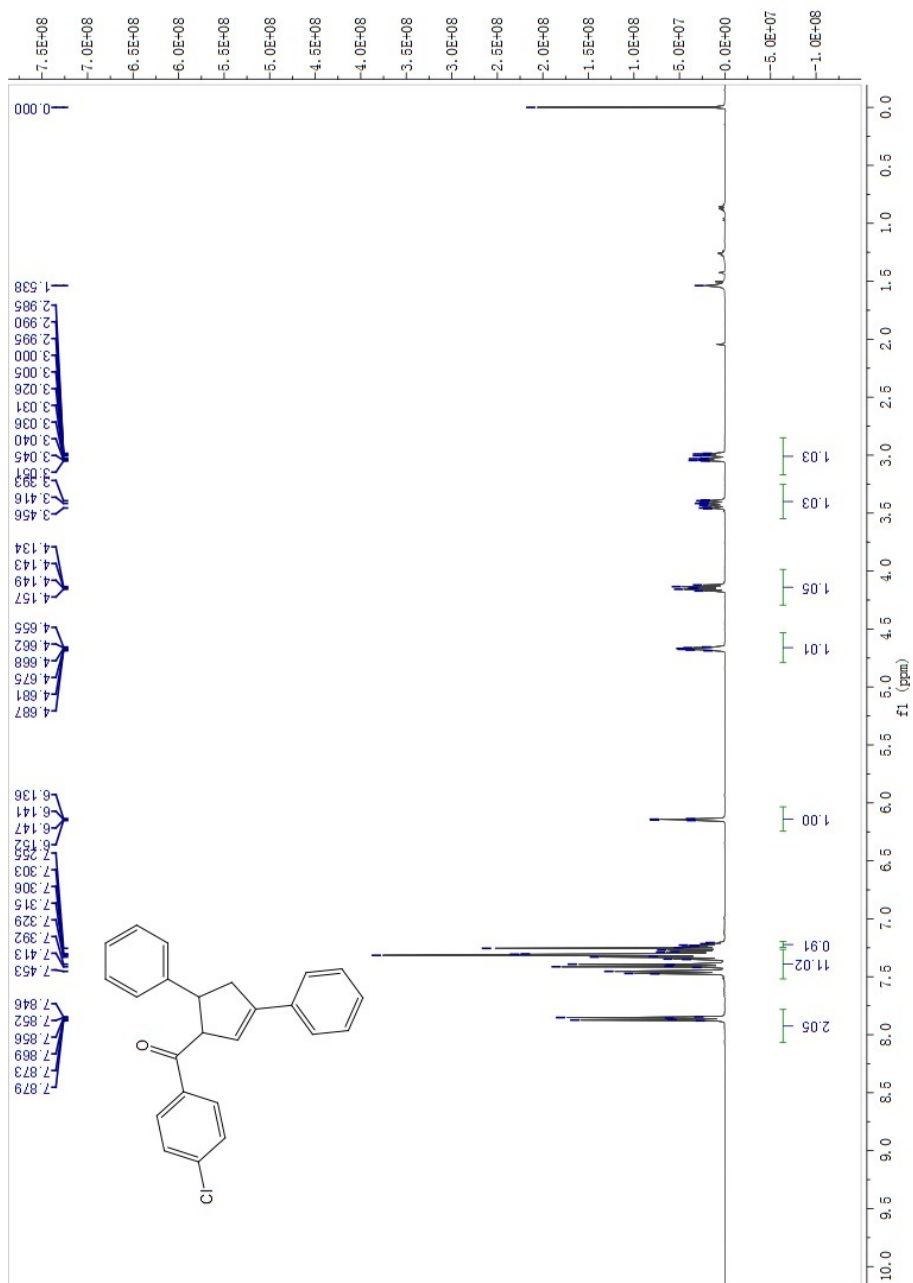

<sup>13</sup>C NMR Spectrum of (4-chlorophenyl)(3,5-diphenylcyclopent-2-en-1-yl) methanone **3da**

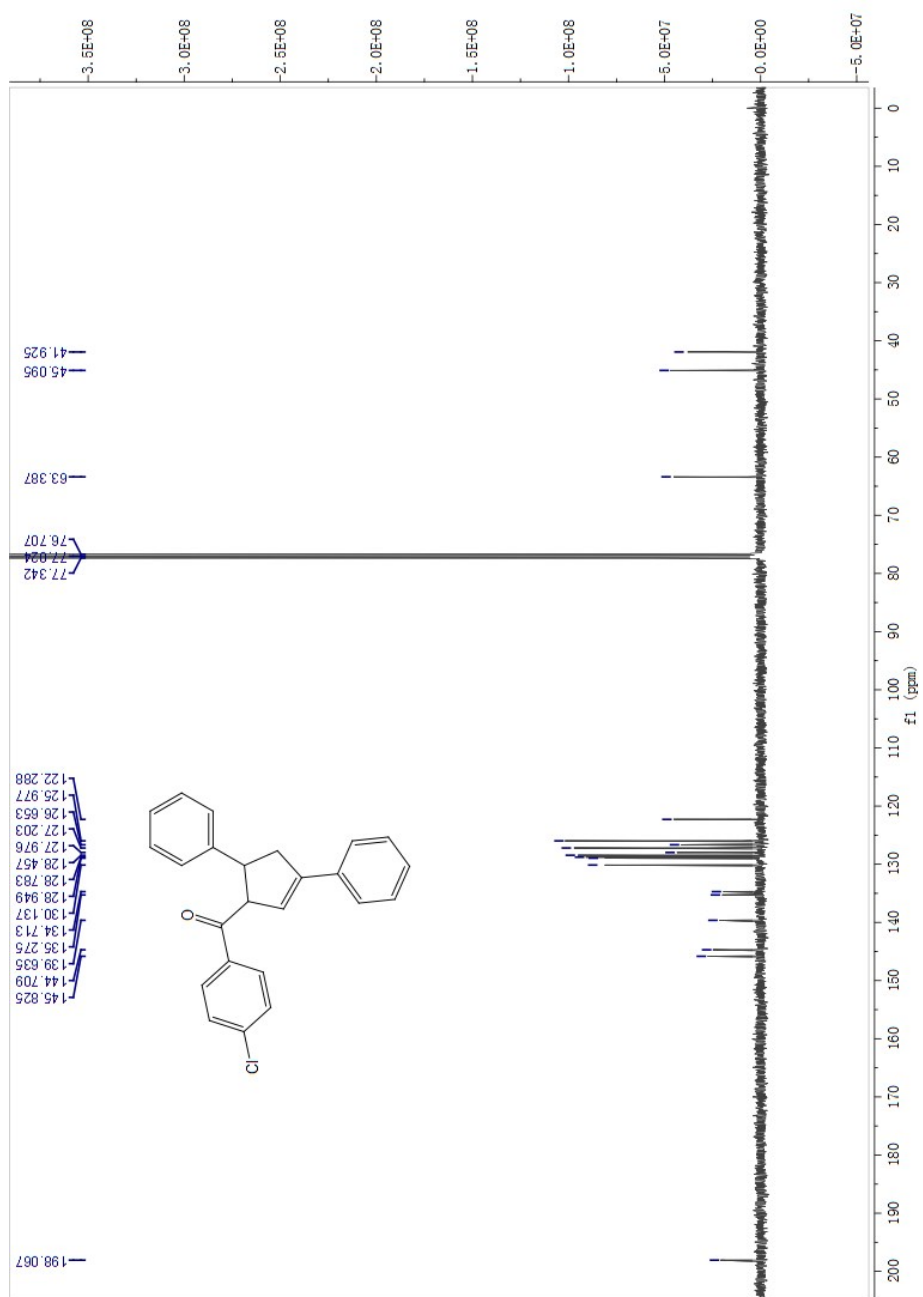

HR-MS Spectrum of (4-chlorophenyl)(3,5-diphenylcyclopent-2-en-1-yl) methanone **3da**

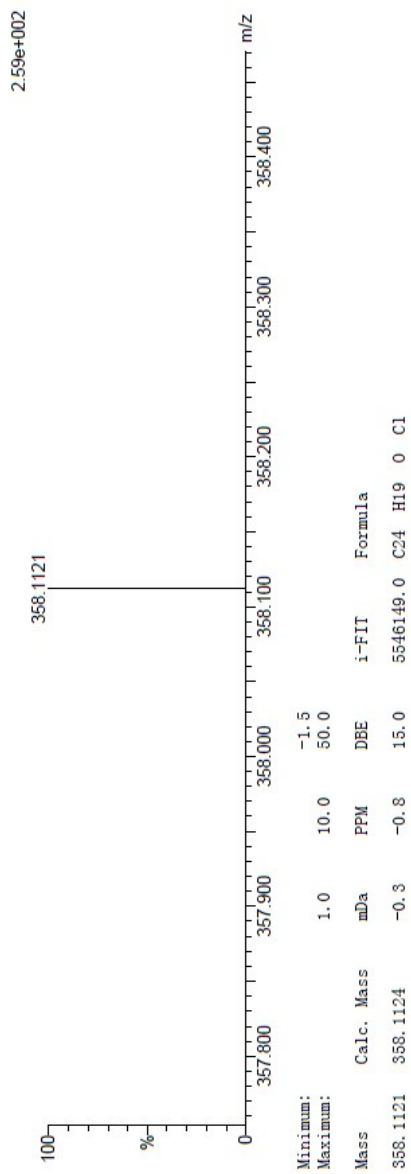



<sup>1</sup>H NMR Spectrum of (4-bromophenyl)(3,5-diphenylcyclopent-2-en-1-yl) methanone **3ea**

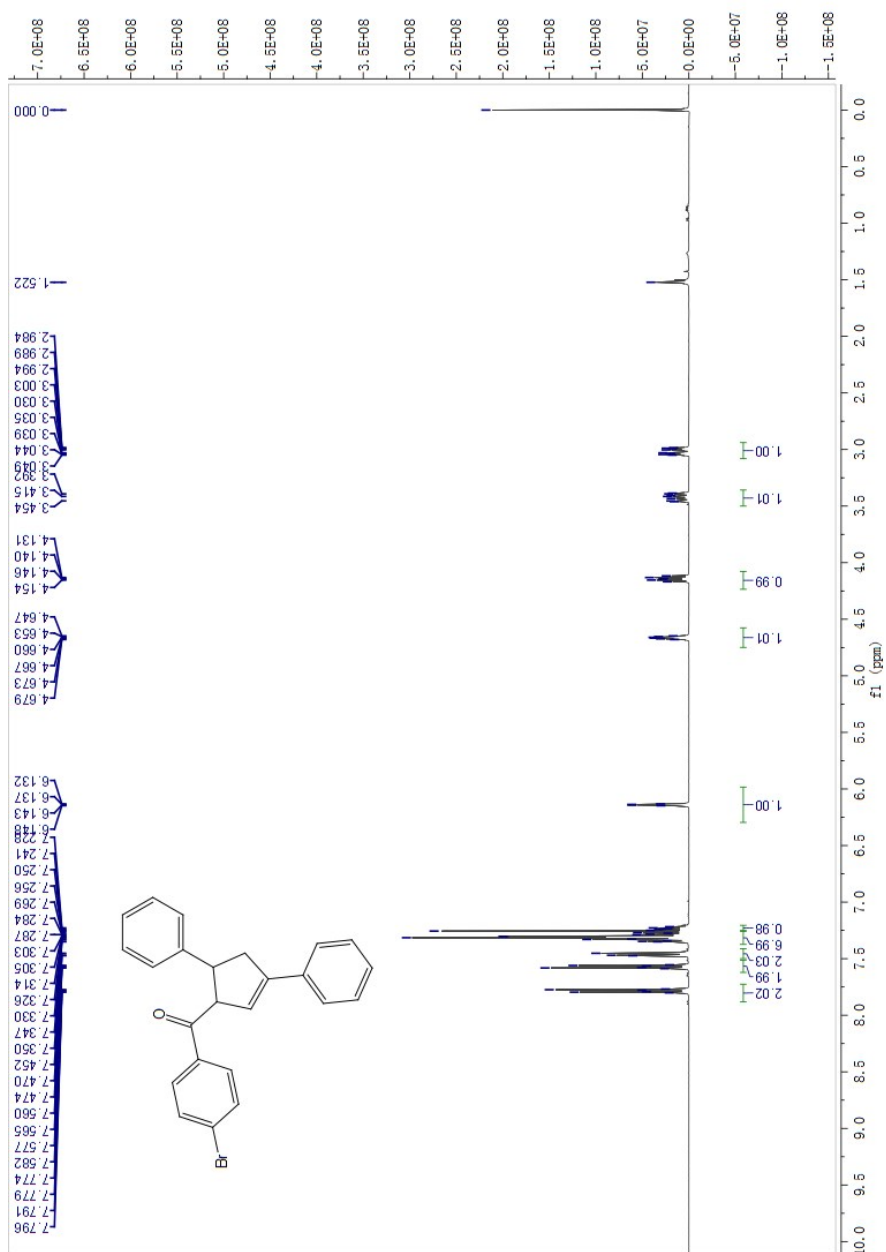

<sup>13</sup>C NMR Spectrum of (4-bromophenyl)(3,5-diphenylcyclopent-2-en-1-yl) methanone **3ea**

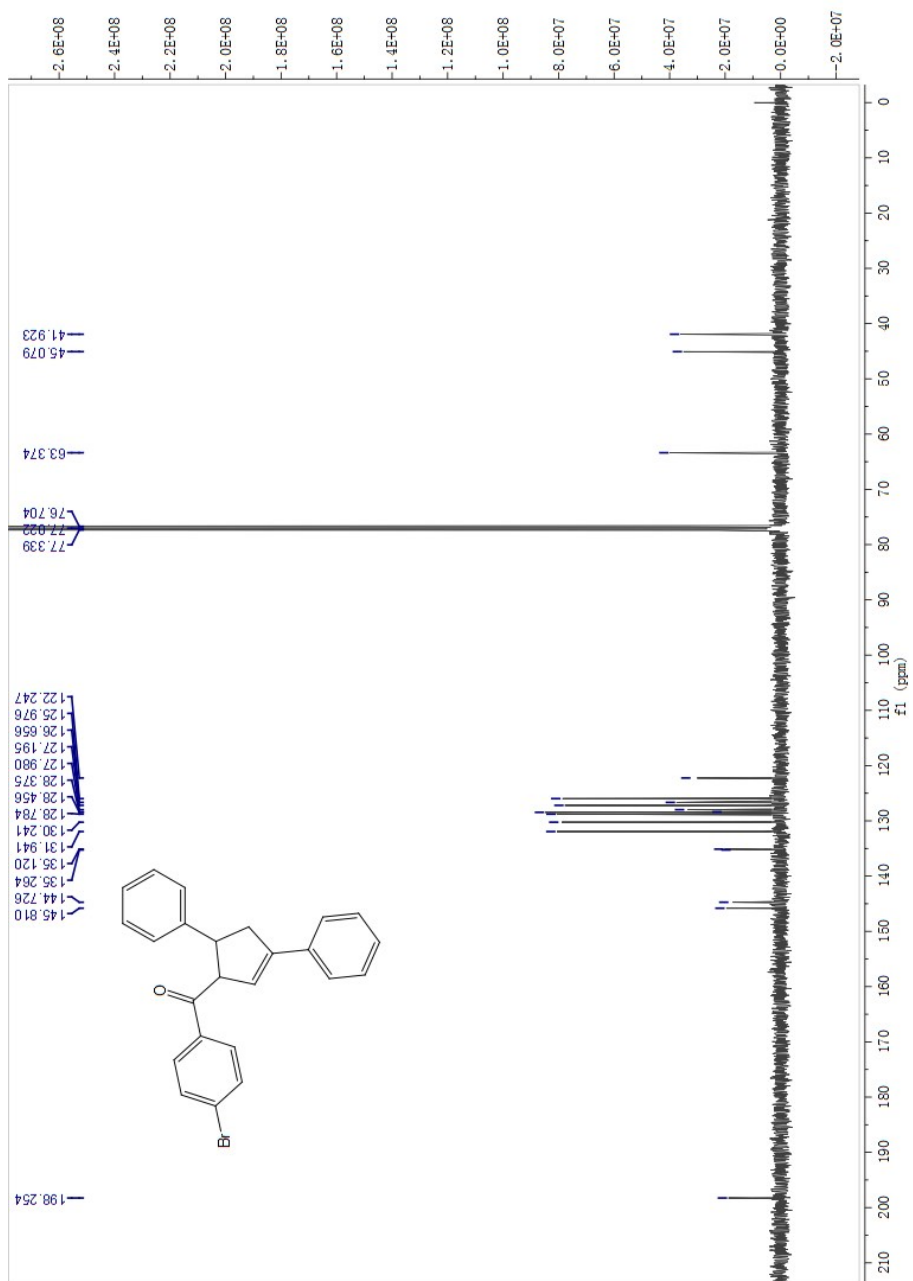

HR-MS Spectrum of (4-bromophenyl)(3,5-diphenylcyclopent-2-en-1-yl) methanone **3ea**

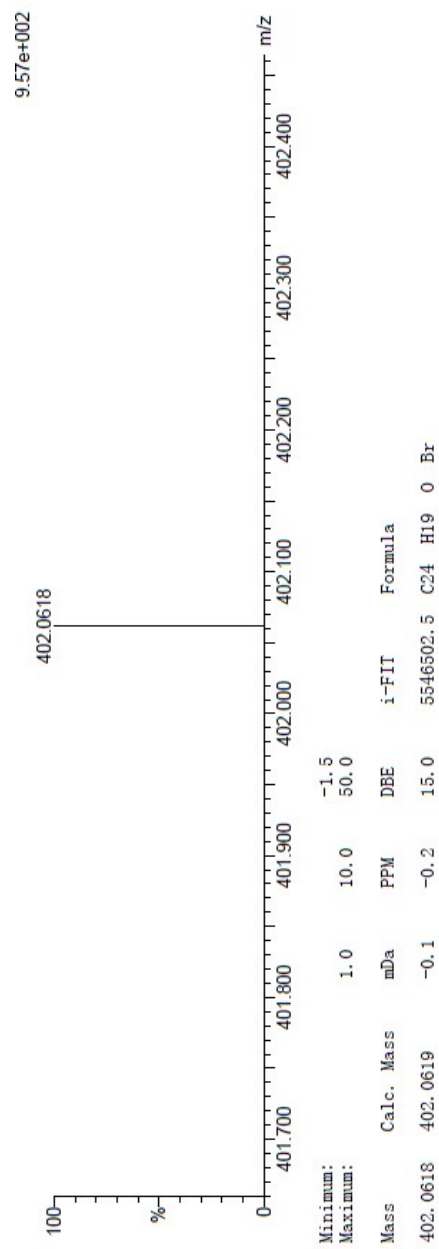

<sup>1</sup>H NMR Spectrum of (3-phenyl-5-(3-tolyl)cyclopent-2-en-1-yl)(4-tolyl) methanone **3ab**

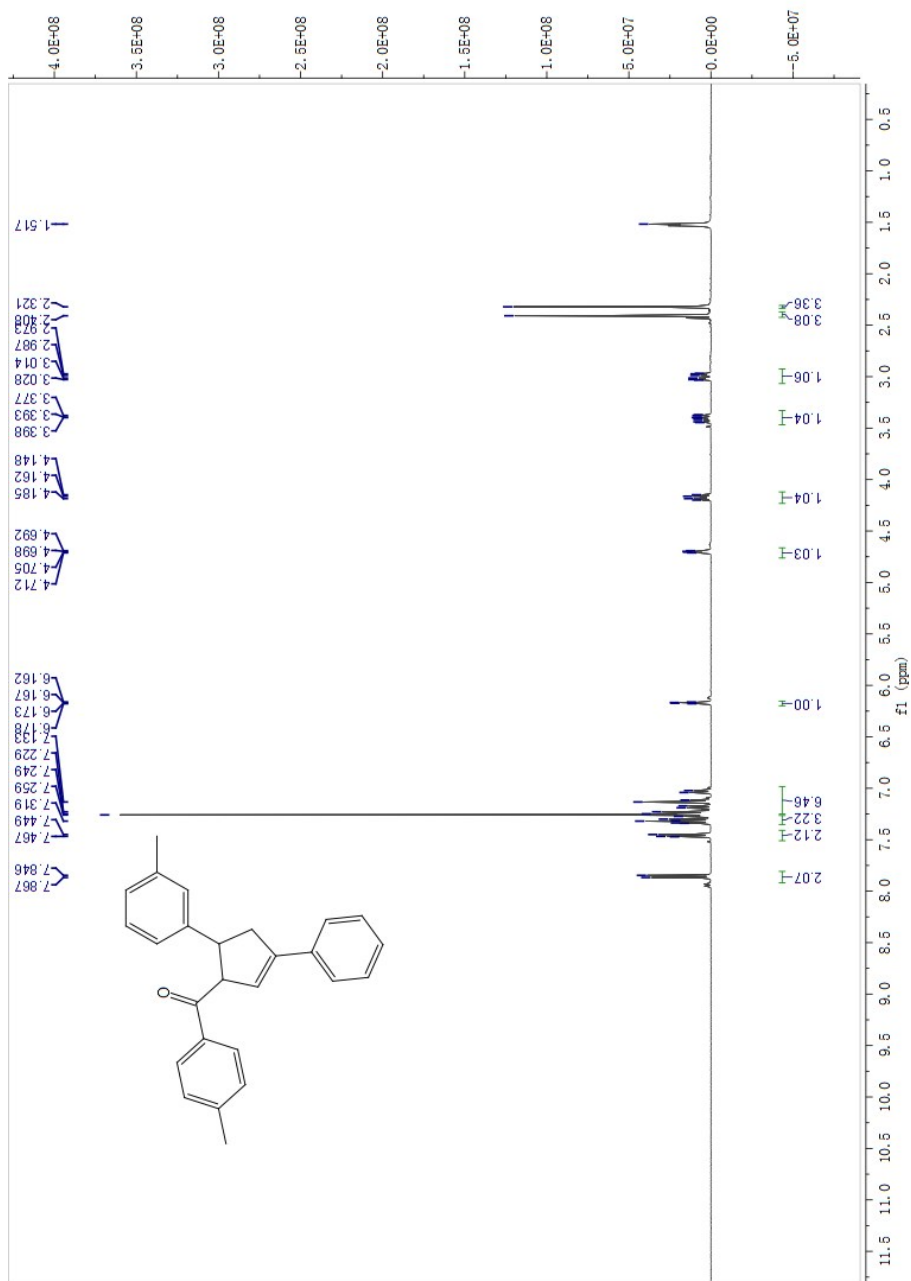

<sup>13</sup>C NMR Spectrum of (3-phenyl-5-(3-tolyl)cyclopent-2-en-1-yl)(4-tolyl) methanone **3ab**

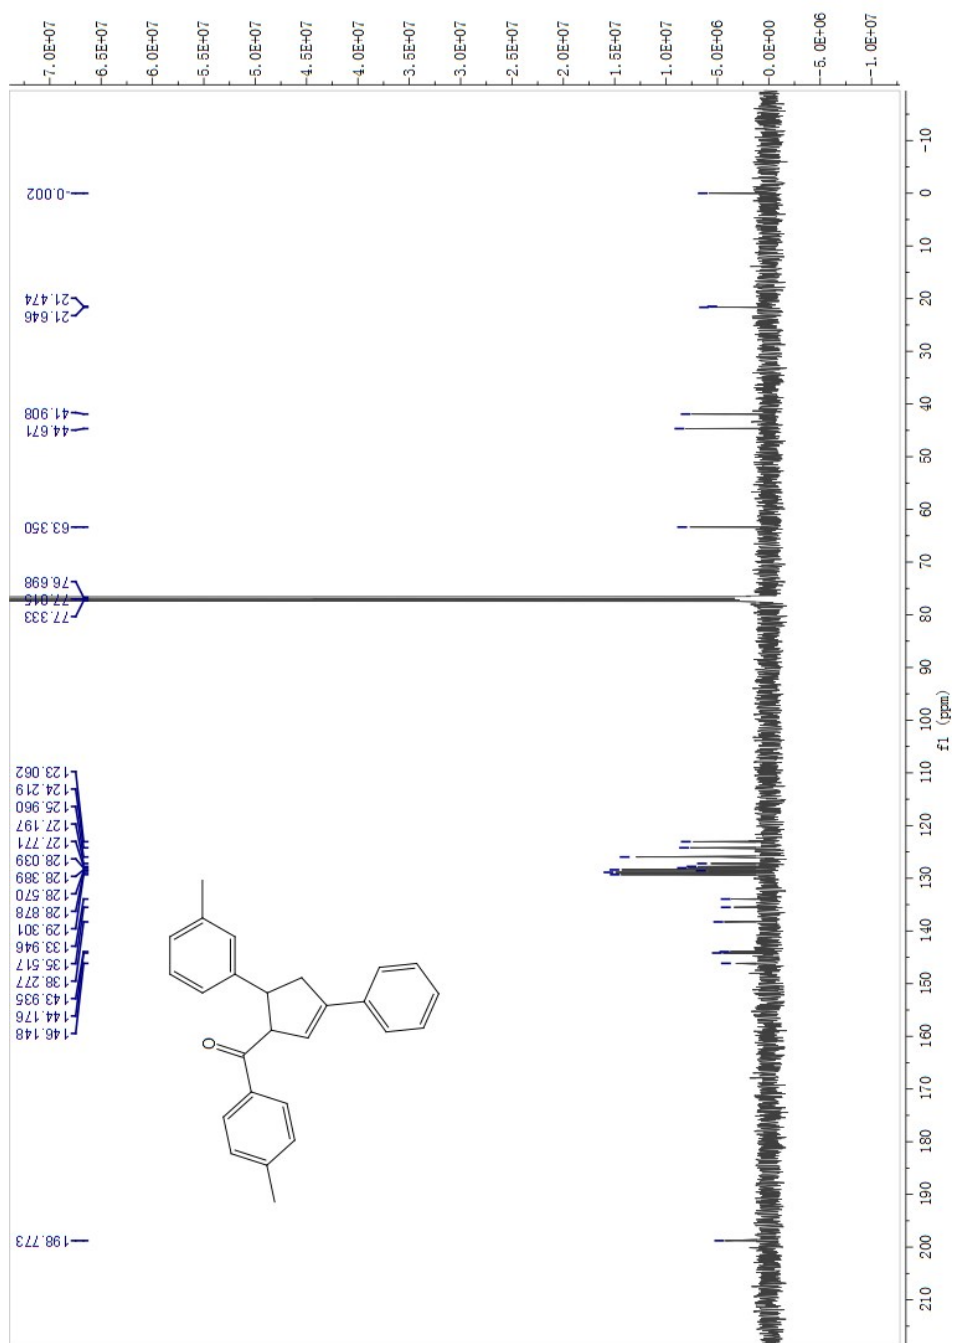

HR-MS Spectrum of (3-phenyl-5-(3-tolyl)cyclopent-2-en-1-yl)(4-tolyl) methanone **3ab**

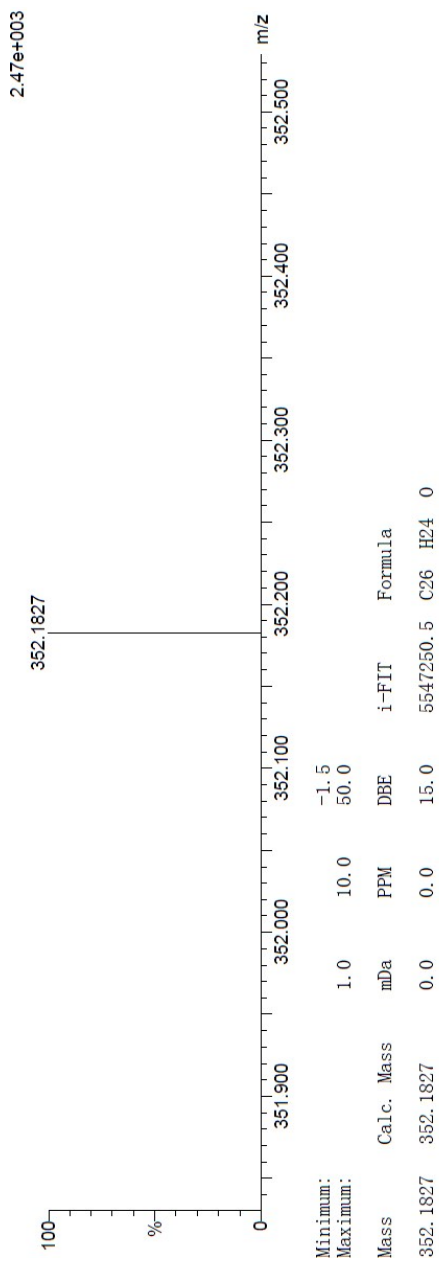

<sup>1</sup>H NMR Spectrum of (5-(4-fluorophenyl)-3-phenylcyclopent-2-en-1-yl)  
(4-tolyl)methanone **3ac**

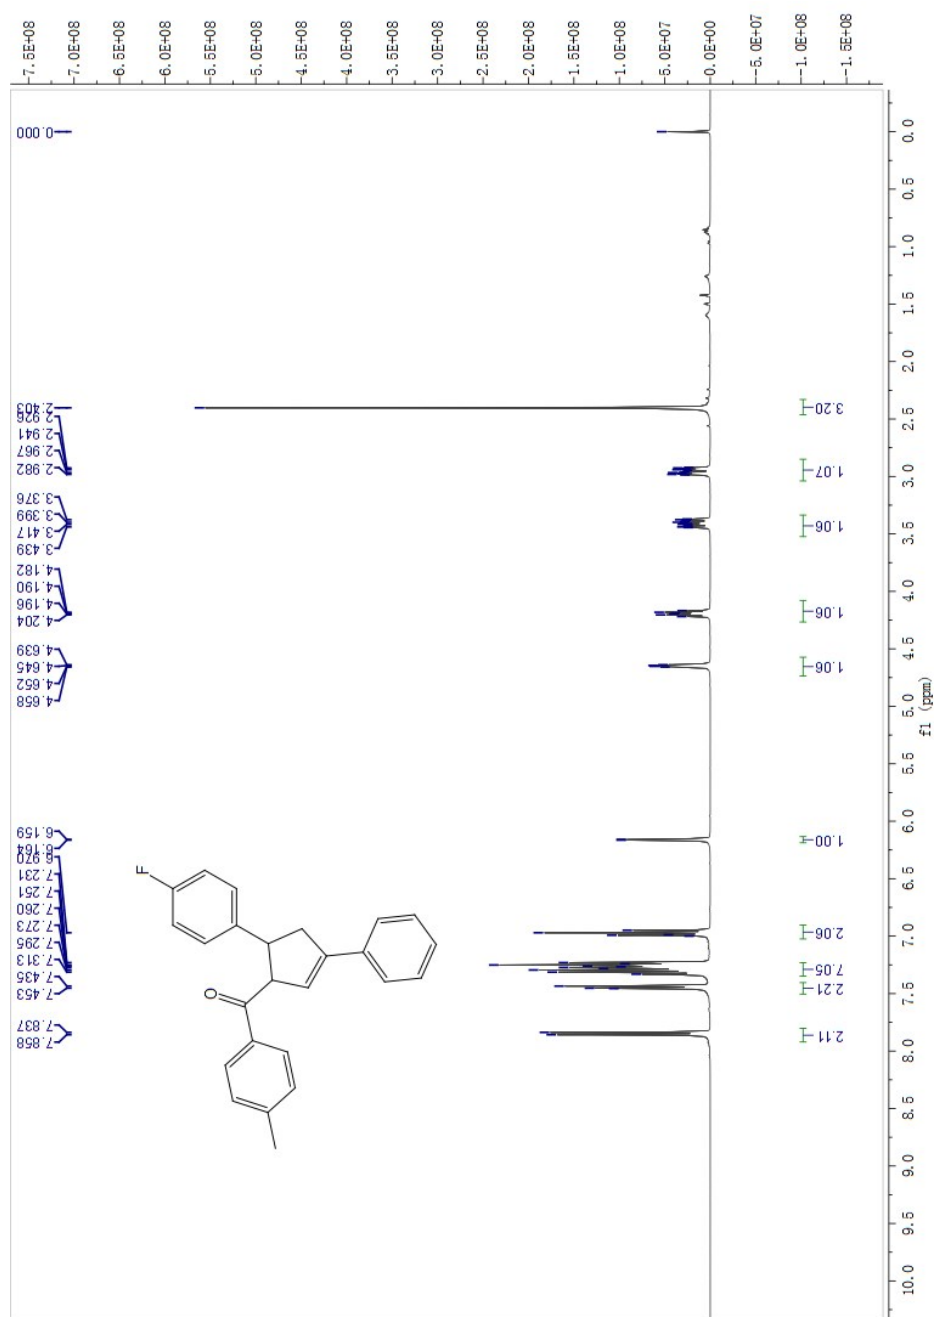

<sup>13</sup>C NMR Spectrum of (5-(4-fluorophenyl)-3-phenylcyclopent-2-en-1-yl)  
(4-tolyl)methanone **3ac**

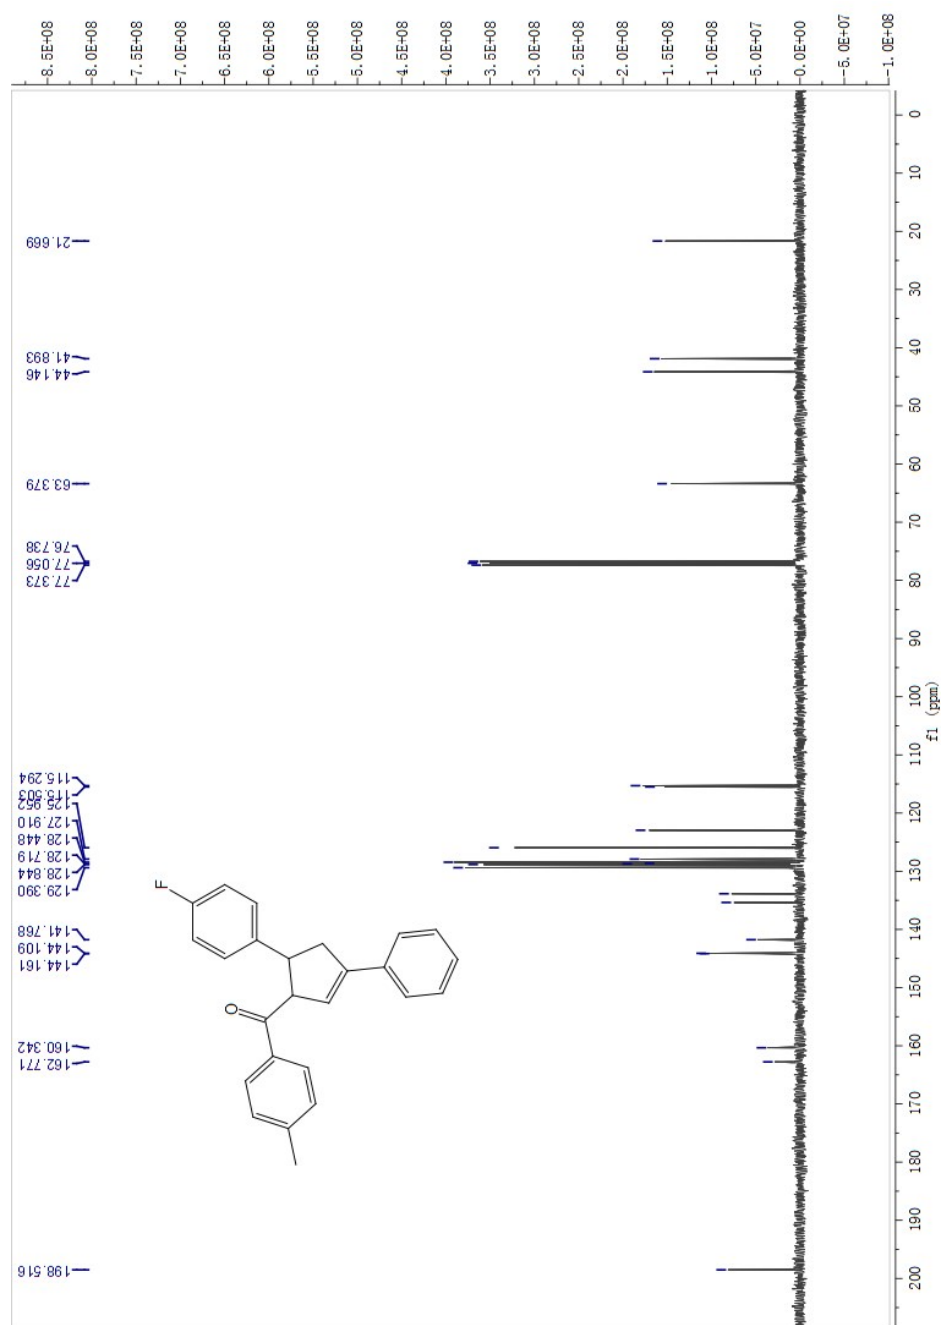



HR-MS Spectrum of (5-(4-fluorophenyl)-3-phenylcyclopent-2-en-1-yl)  
(4-tolyl)methanone **3ac**

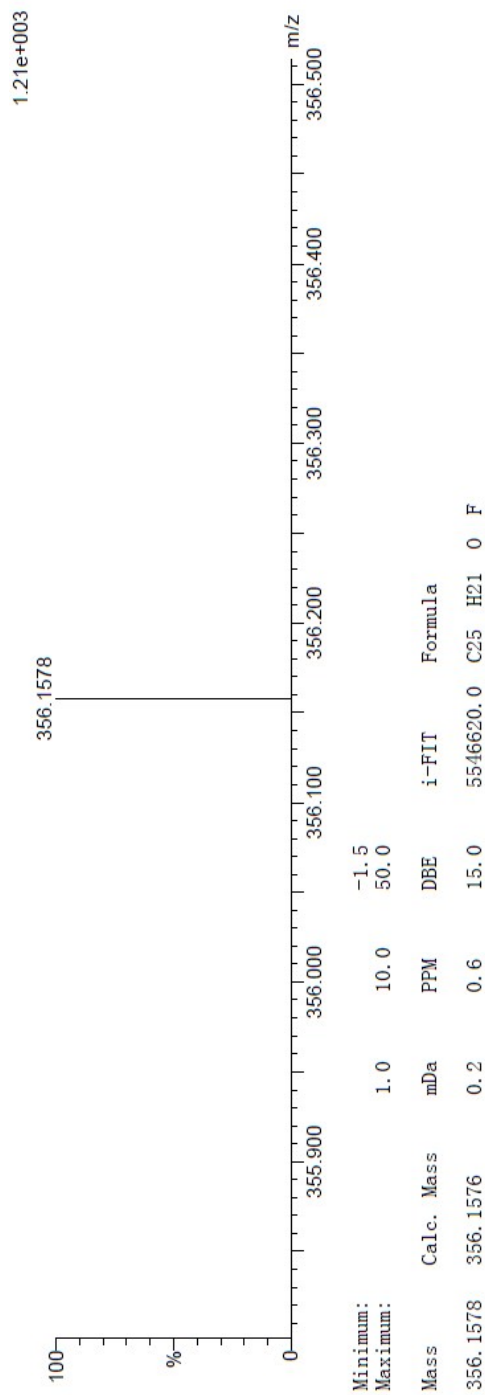

<sup>1</sup>H NMR Spectrum of (5-(3-chlorophenyl)-3-phenylcyclopent-2-en-1-yl)  
(4-tolyl)methanone **3ad**

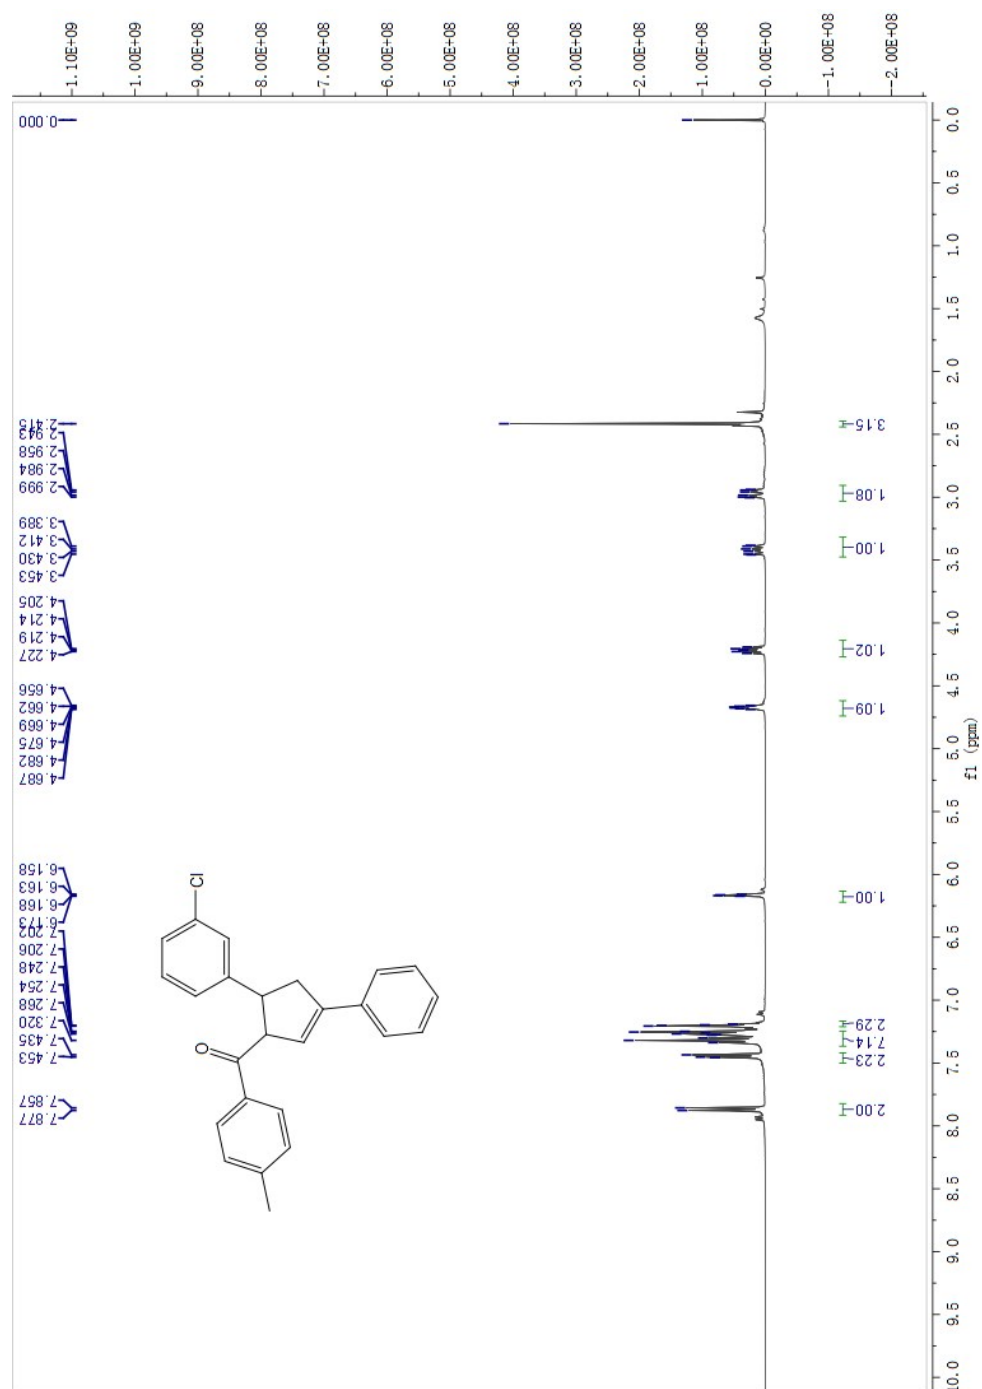

<sup>13</sup>C NMR Spectrum of (5-(3-chlorophenyl)-3-phenylcyclopent-2-en-1-yl)  
(4-tolyl)methanone **3ad**

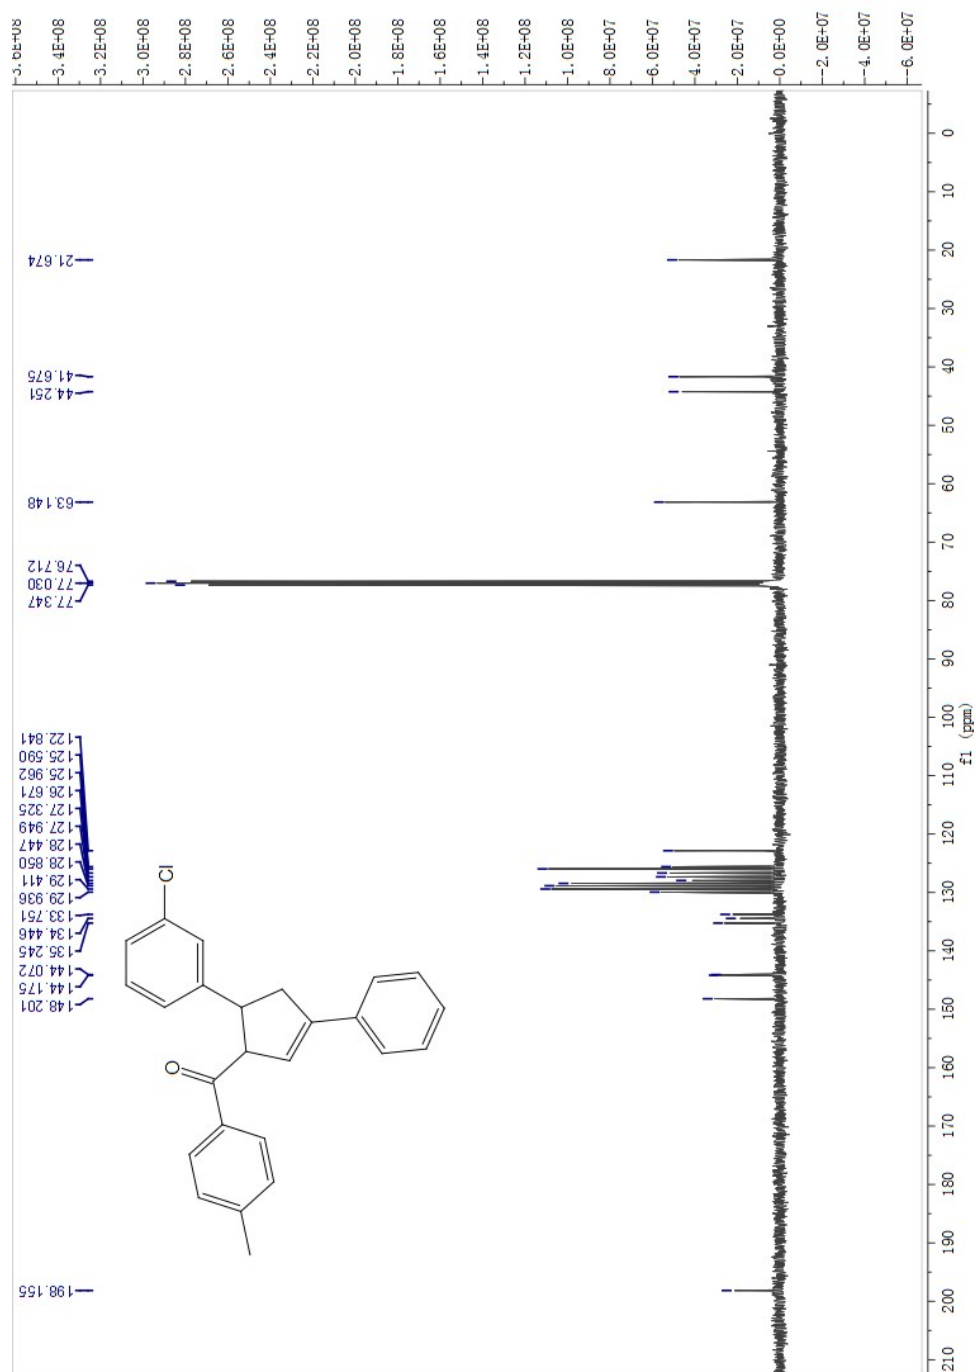

HR-MS Spectrum of (5-(3-chlorophenyl)-3-phenylcyclopent-2-en-1-yl)  
(4-tolyl)methanone **3ad**

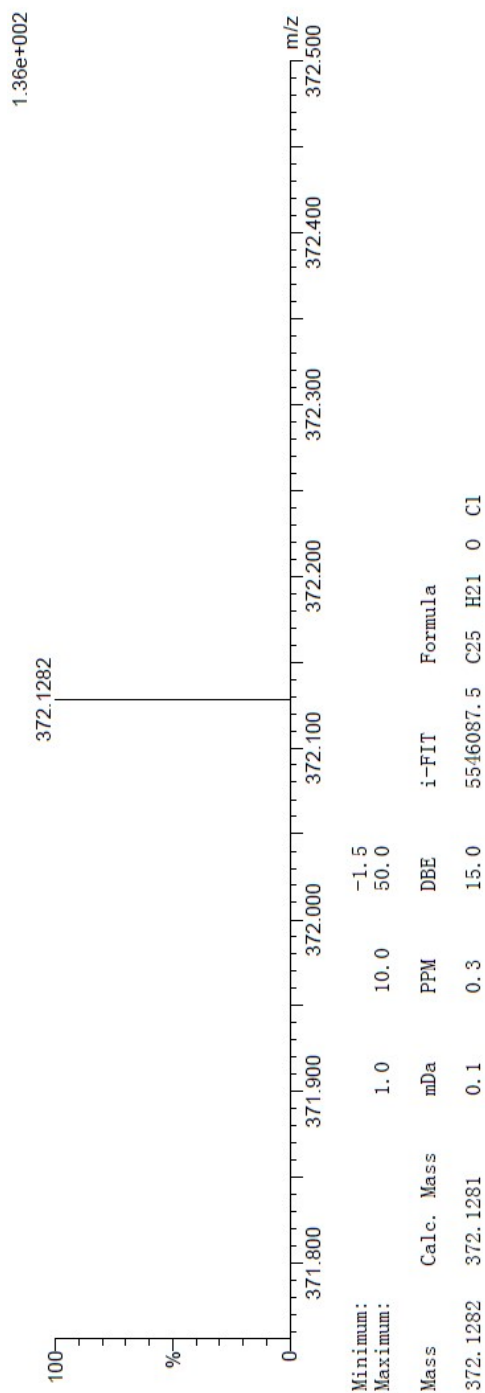

<sup>1</sup>H NMR Spectrum of (5-(3-bromophenyl)-3-phenylcyclopent-2-en-1-yl)  
(4-tolyl)methanone **3ae**

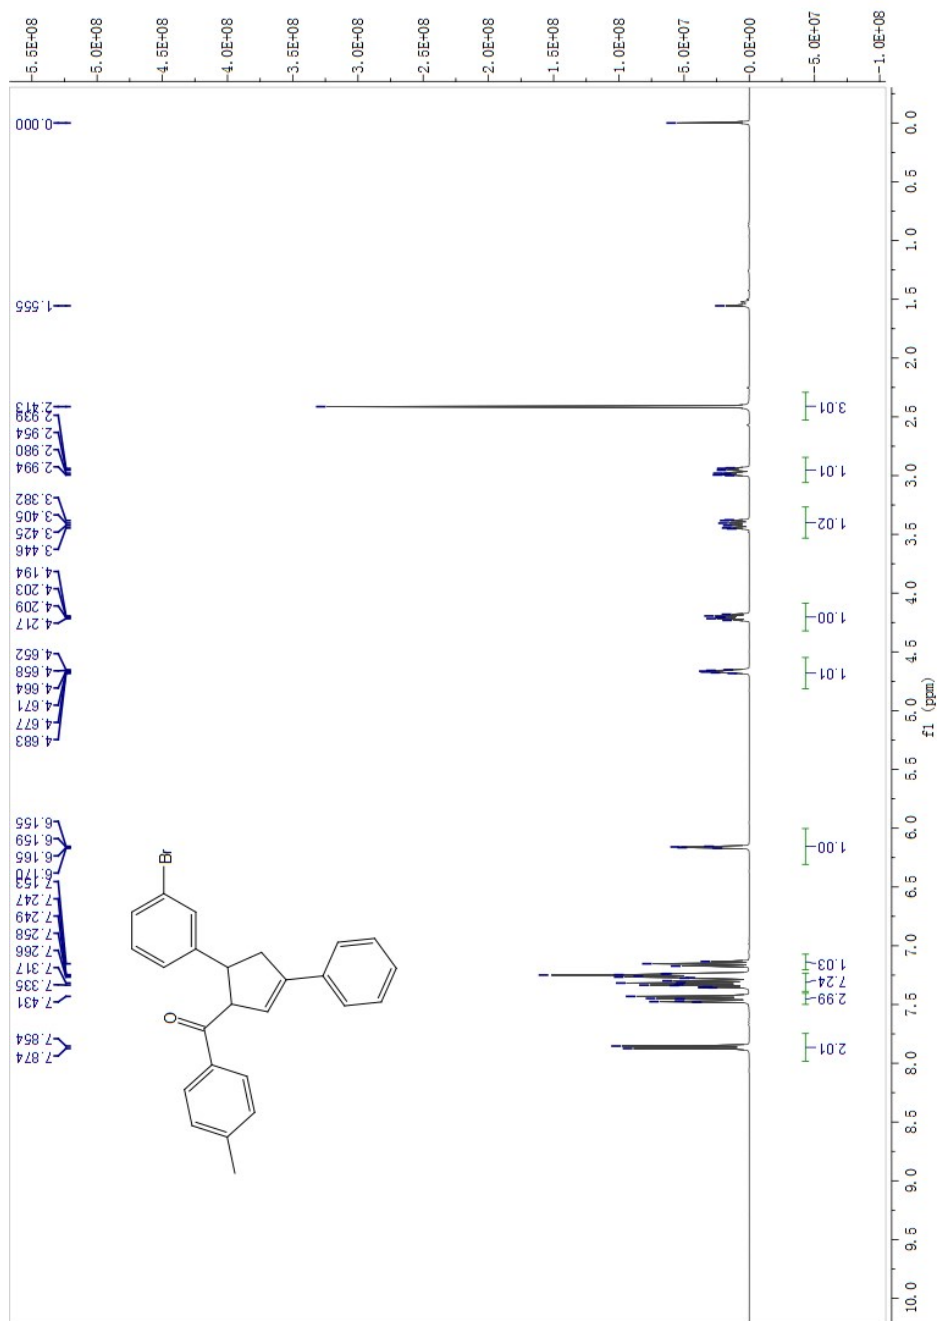

<sup>13</sup>C NMR Spectrum of (5-(3-bromophenyl)-3-phenylcyclopent-2-en-1-yl)  
(4-tolyl)methanone **3ae**

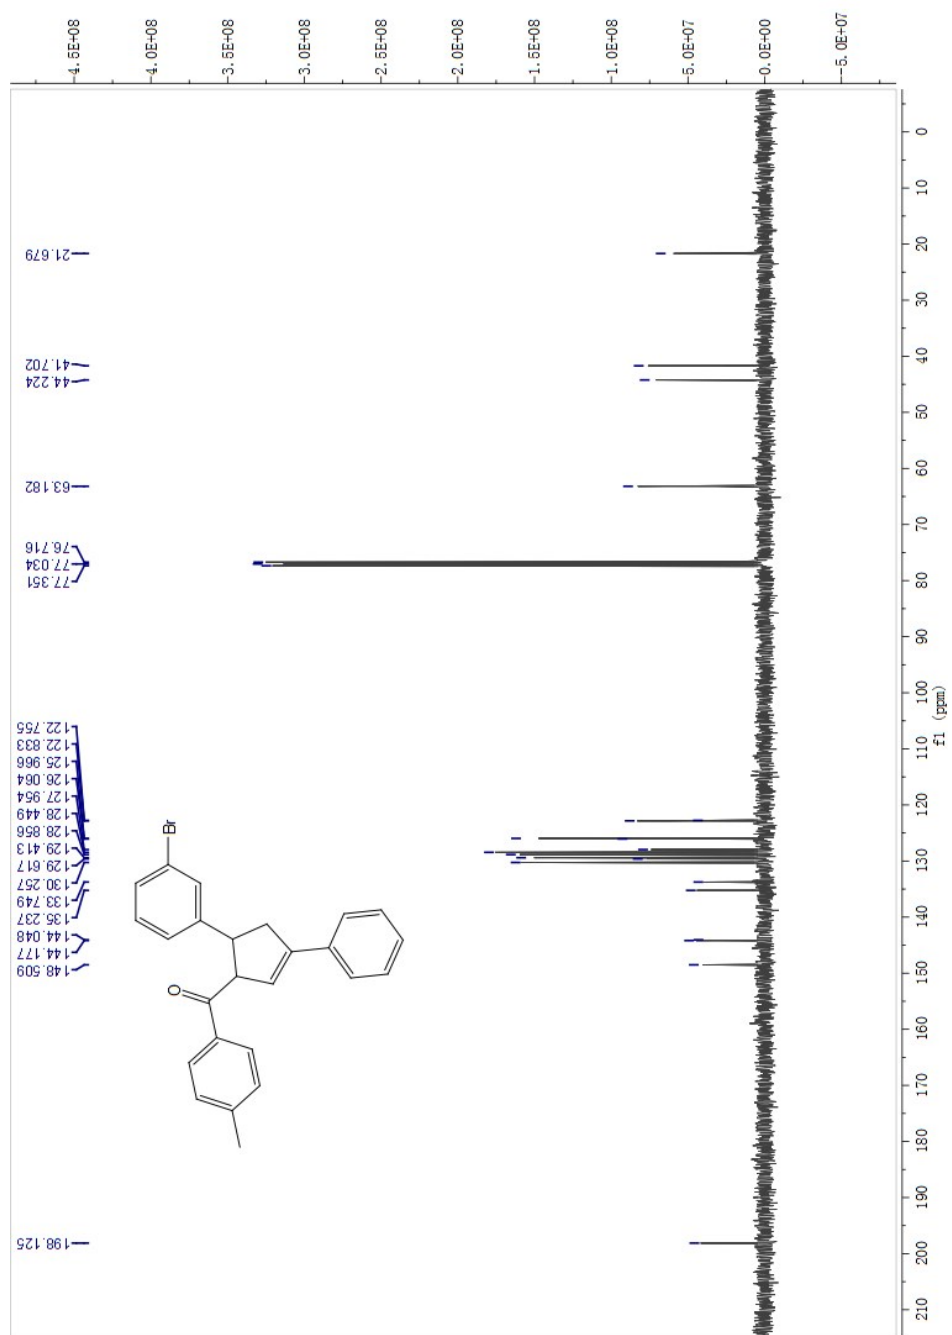

HR-MS Spectrum of (5-(3-bromophenyl)-3-phenylcyclopent-2-en-1-yl)  
(4-tolyl)methanone **3ae**

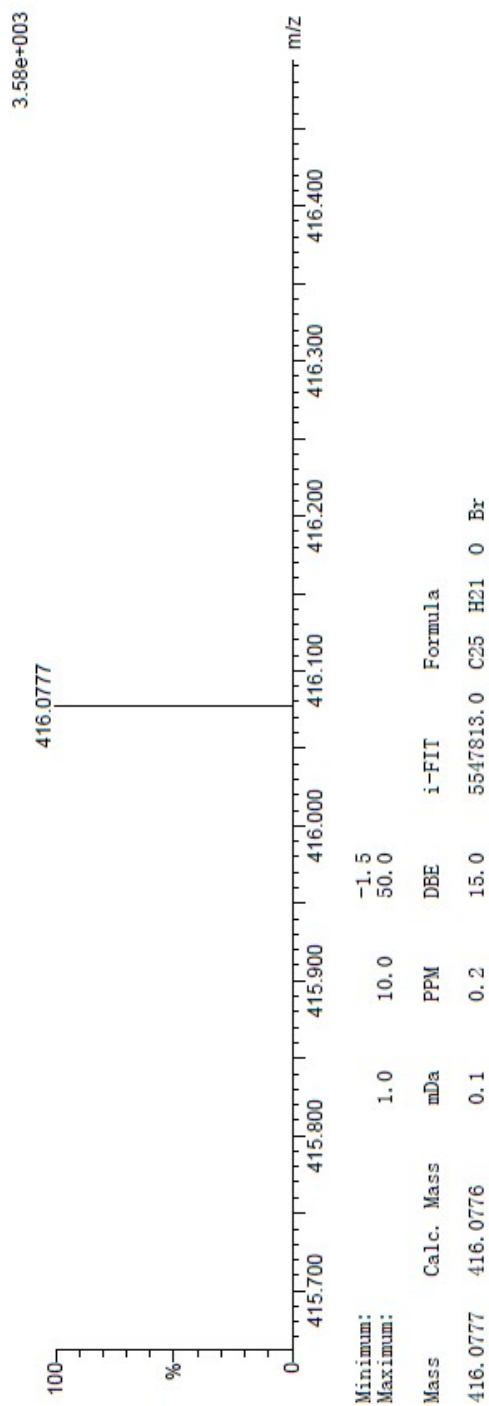

$^1\text{H}$  NMR Spectrum of (5-phenyl-3-(4-tolyl)cyclopent-2-en-1-yl) (4-tolyl)methanone **3af**

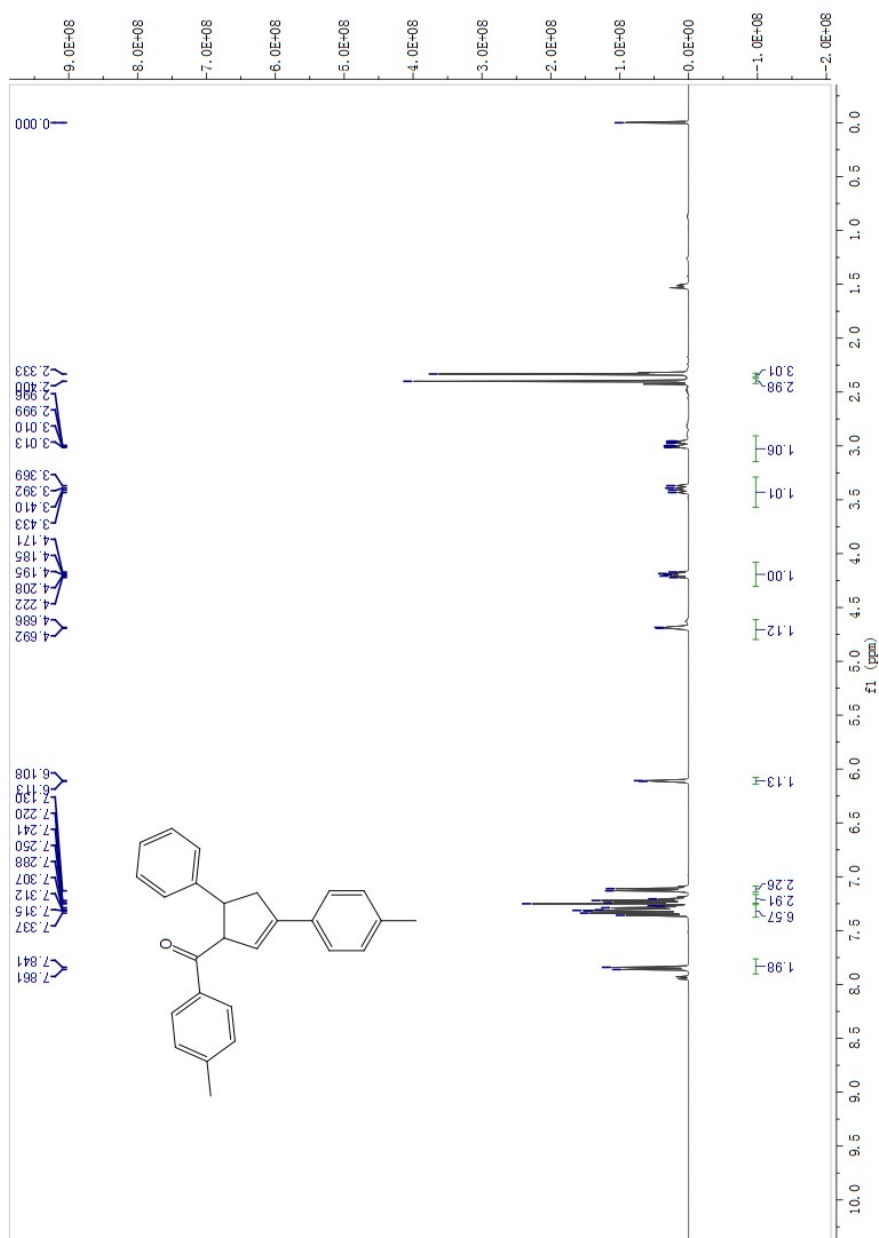



<sup>13</sup>C NMR Spectrum of (5-phenyl-3-(4-tolyl)cyclopent-2-en-1-yl) (4-tolyl)methanone **3af**

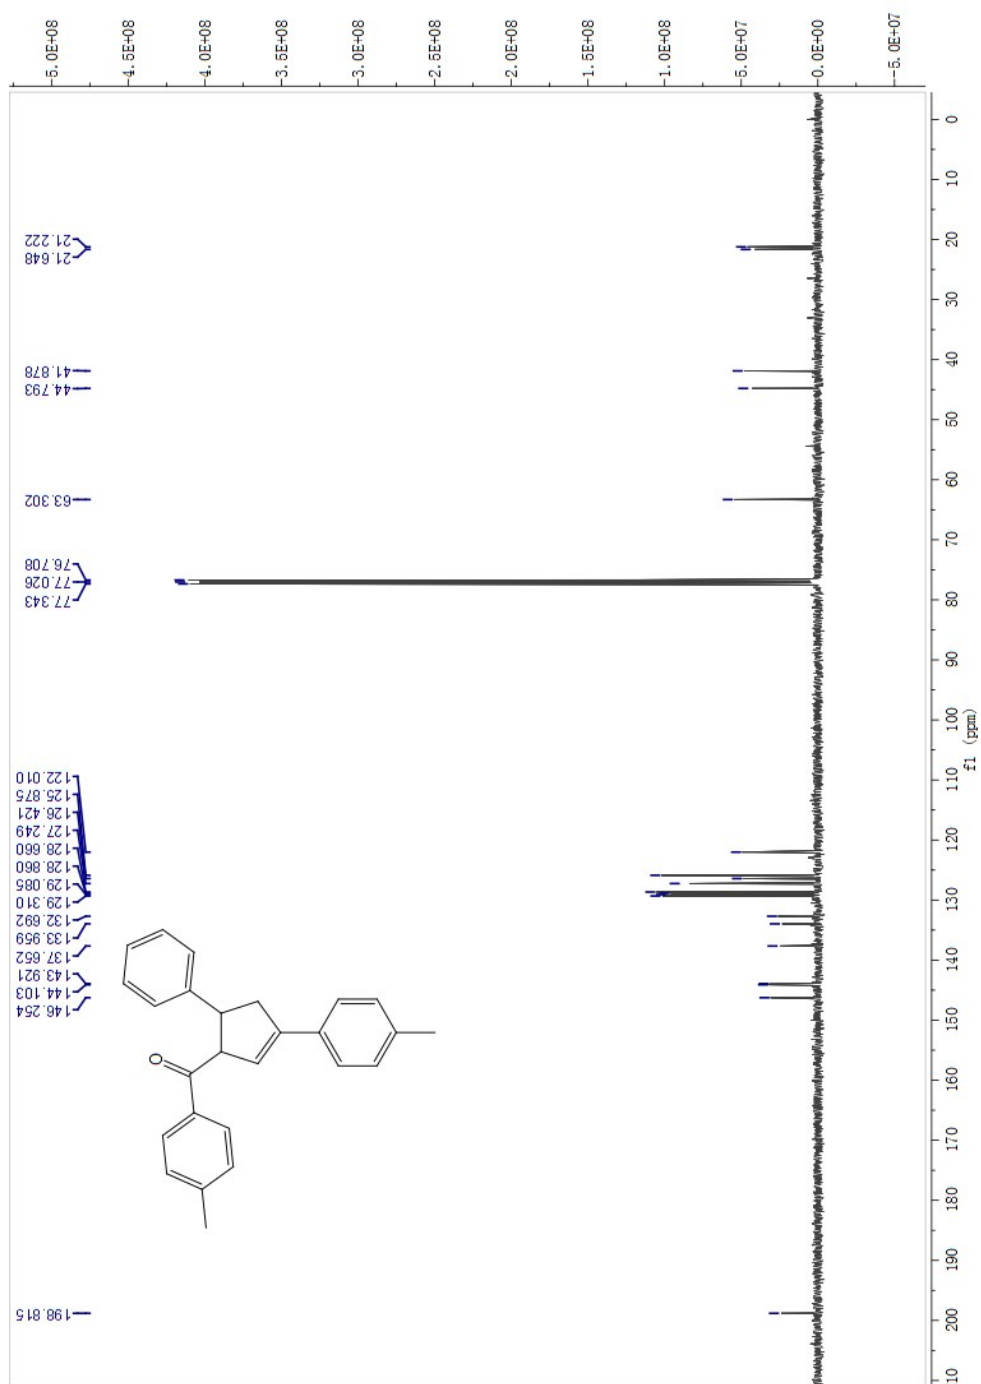

HR-MS Spectrum of (5-phenyl-3-(4-tolyl)cyclopent-2-en-1-yl) (4-tolyl)methanone **3af**

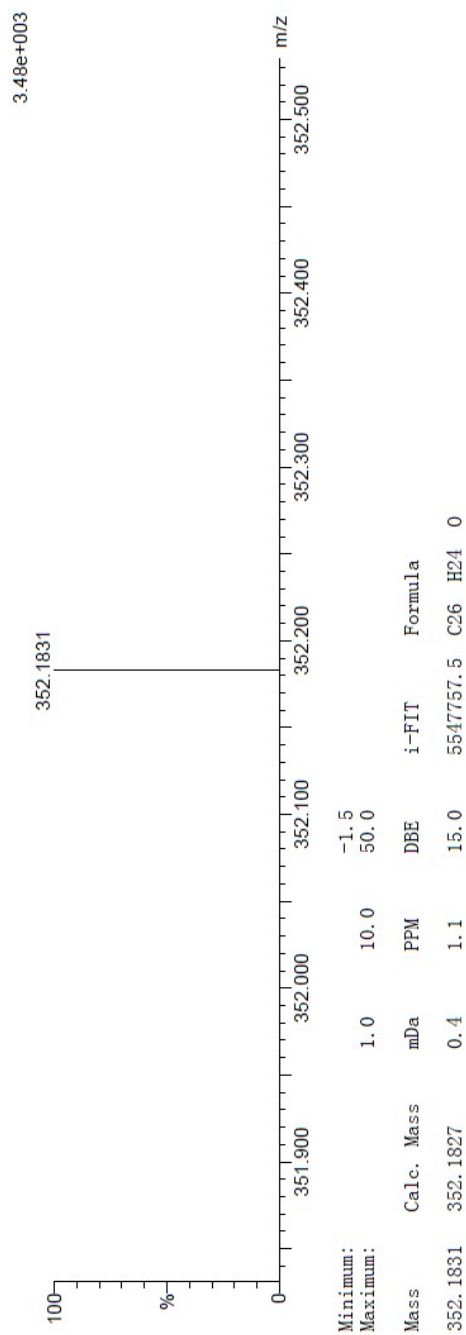

<sup>1</sup>H NMR Spectrum of (3-(4-chlorophenyl)-5-phenylcyclopent-2-en-1-yl)  
(4-tolyl)methanone **3ag**

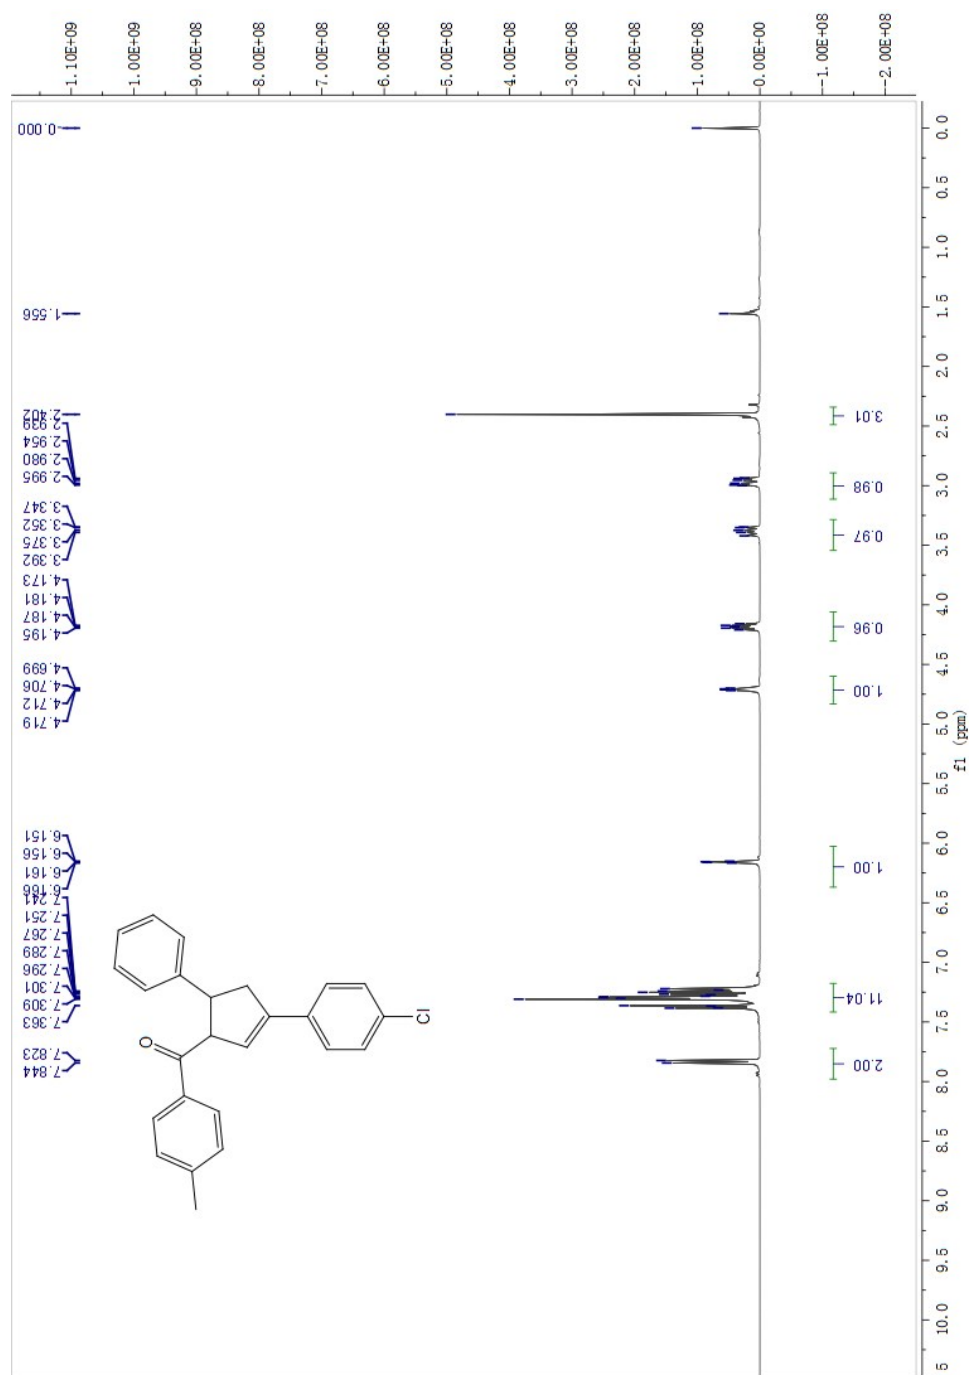

<sup>13</sup>C NMR Spectrum of (3-(4-chlorophenyl)-5-phenylcyclopent-2-en-1-yl)  
(4-tolyl)methanone **3ag**

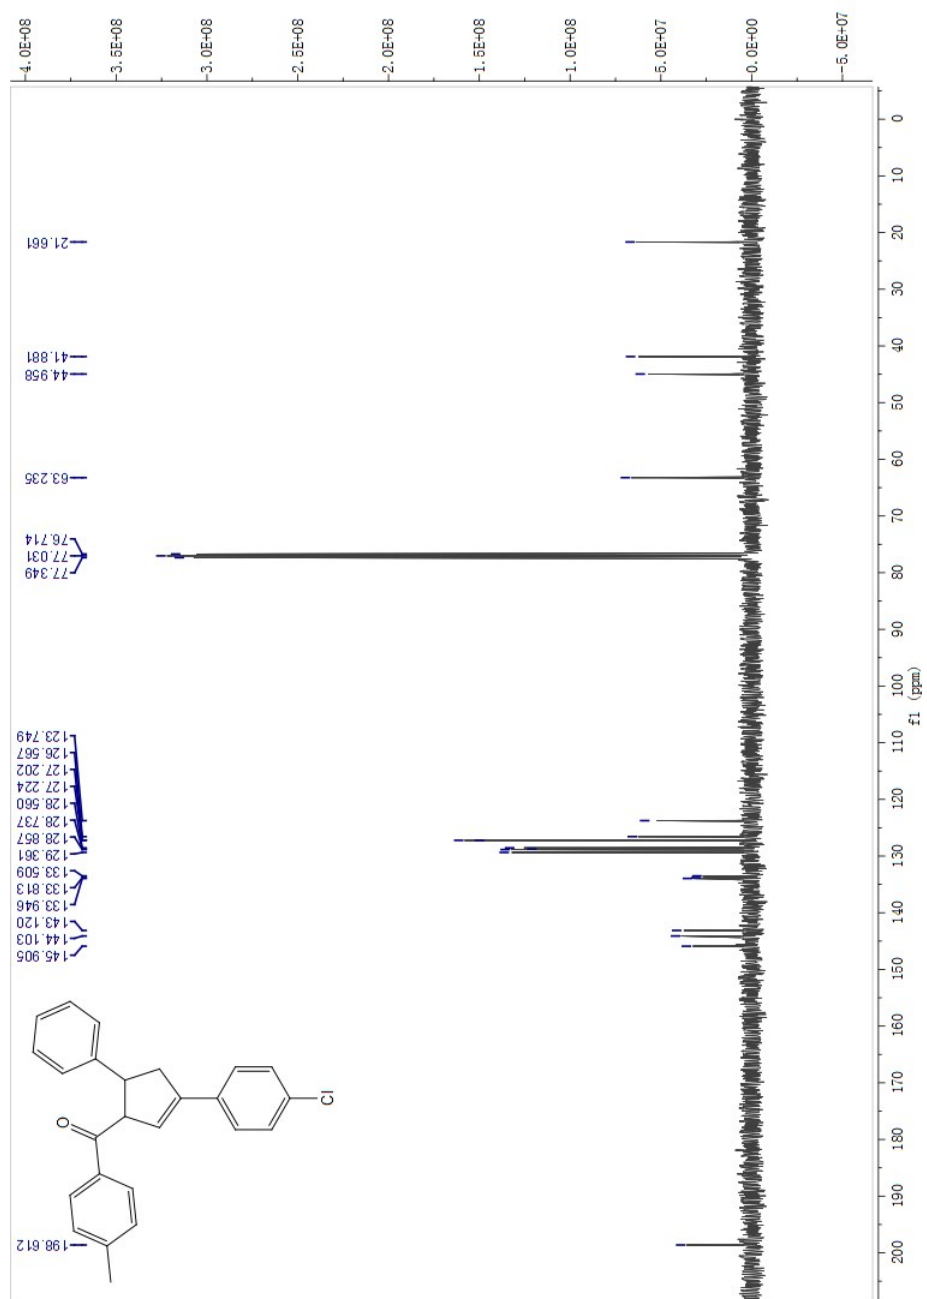

HR-MS Spectrum of (3-(4-chlorophenyl)-5-phenylcyclopent-2-en-1-yl)  
(4-tolyl)methanone **3ag**

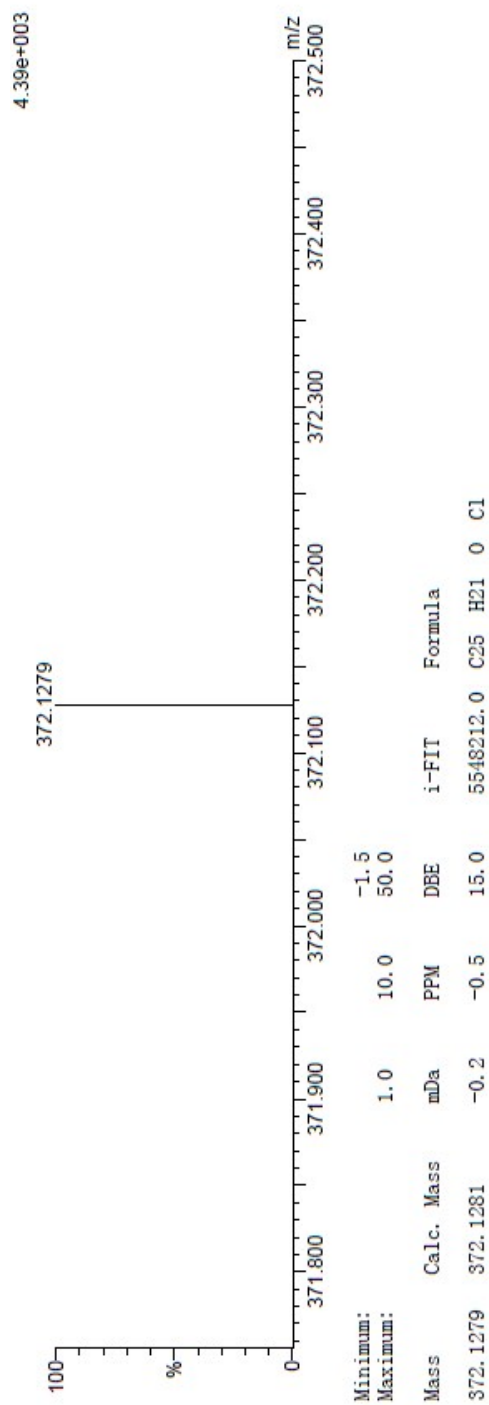

<sup>1</sup>H NMR Spectrum of (5-phenyl-3-(4-(trifluoromethyl)phenyl) cyclopent-2-en-1-yl)(4-tolyl)methanone **3ah**

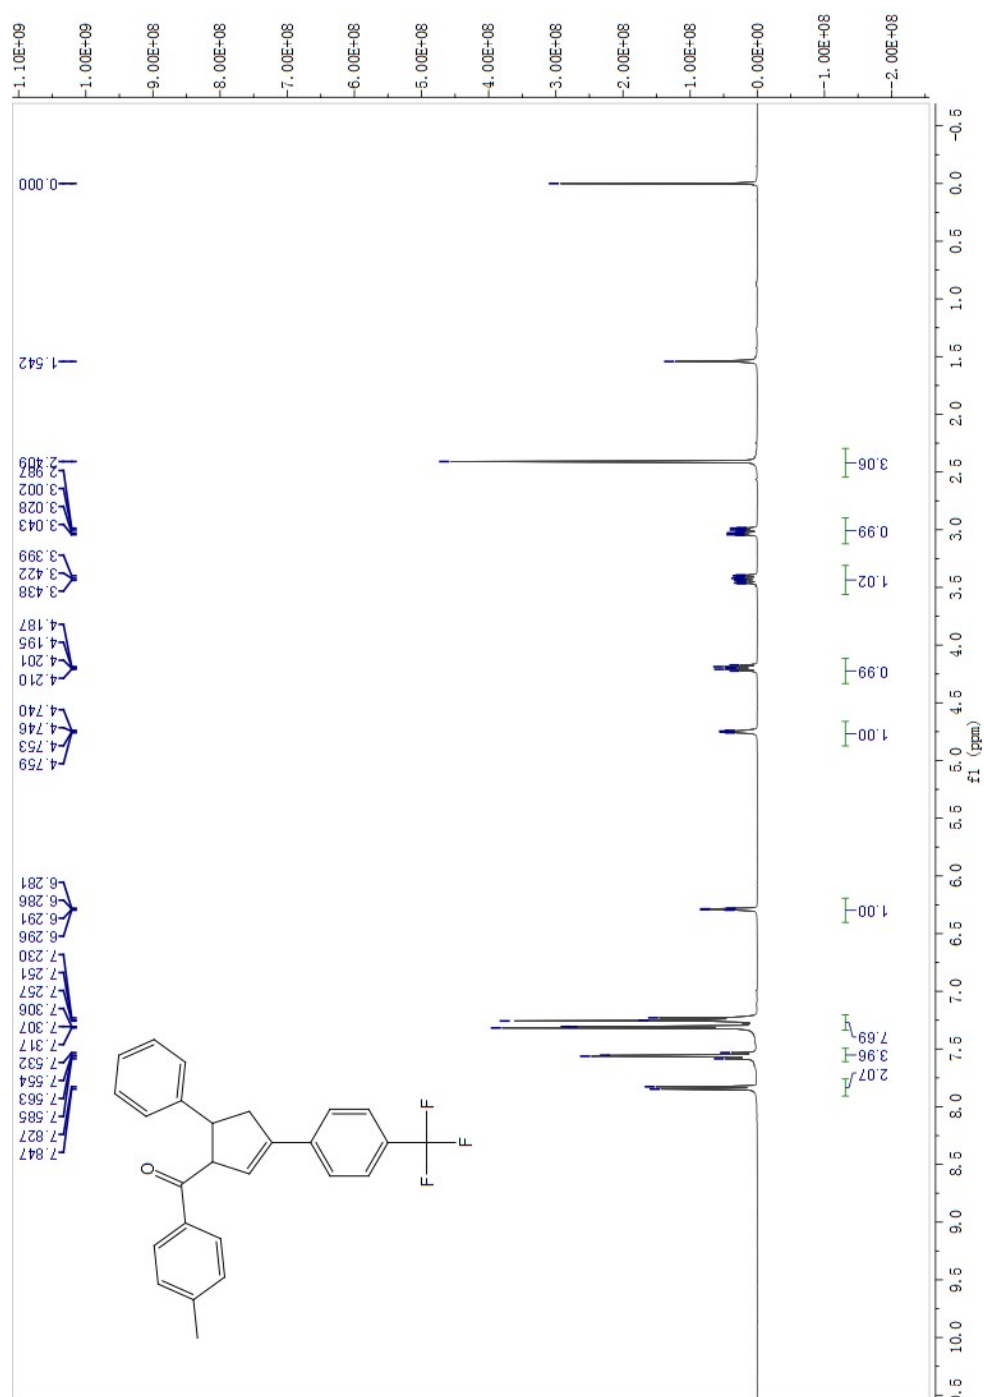

<sup>13</sup>C NMR Spectrum of (5-phenyl-3-(4-(trifluoromethyl)phenyl)cyclopent-2-en-1-yl)(4-tolyl)methanone **3ah**

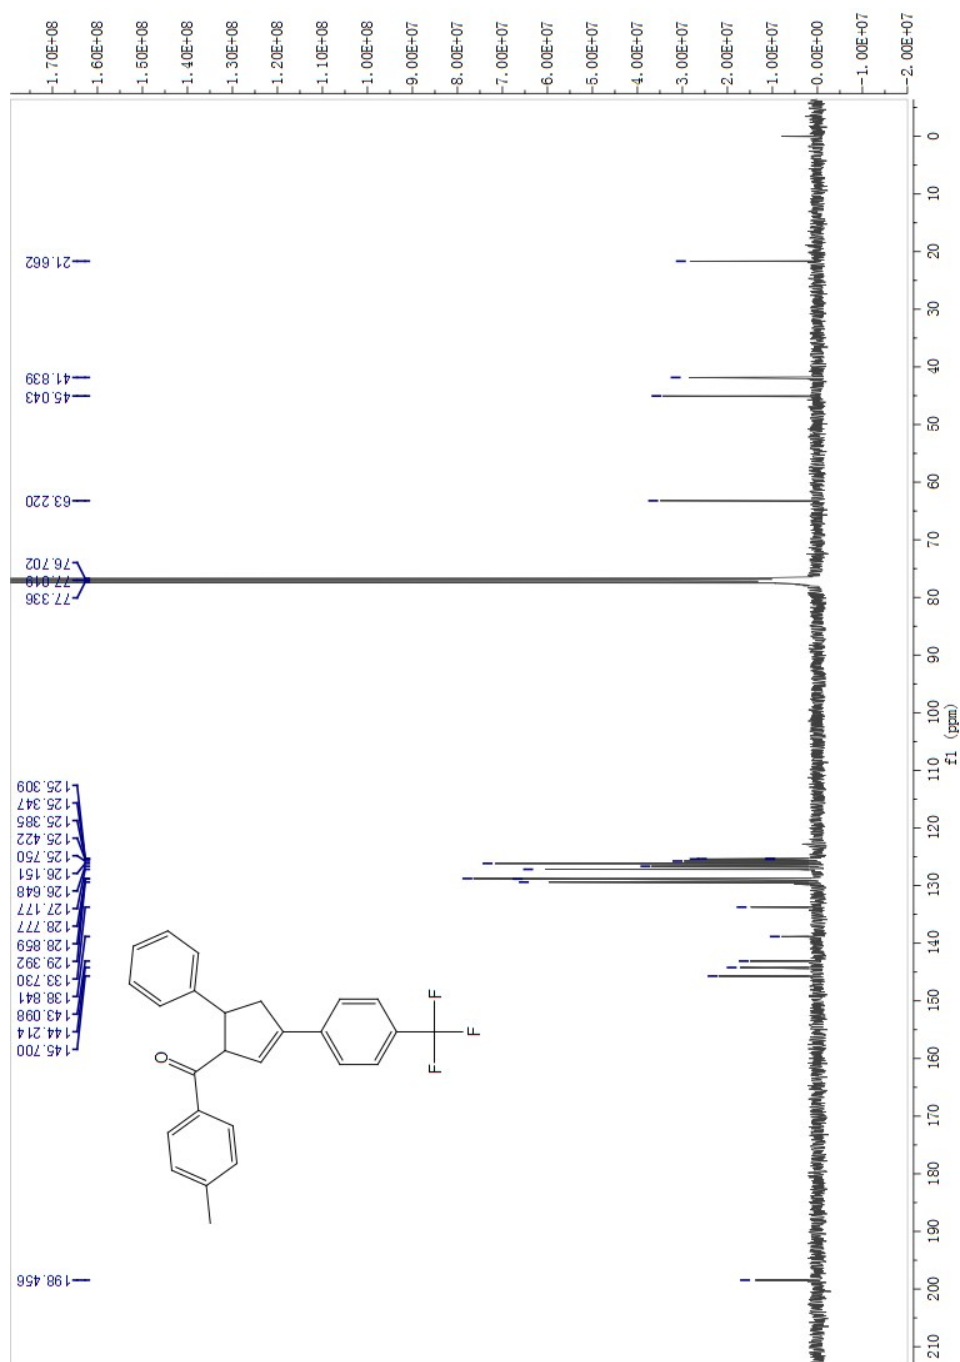

HR-MS Spectrum of (5-phenyl-3-(4-(trifluoromethyl)phenyl) cyclopent-2-en-1-yl)(4-tolyl)methanone **3ah**

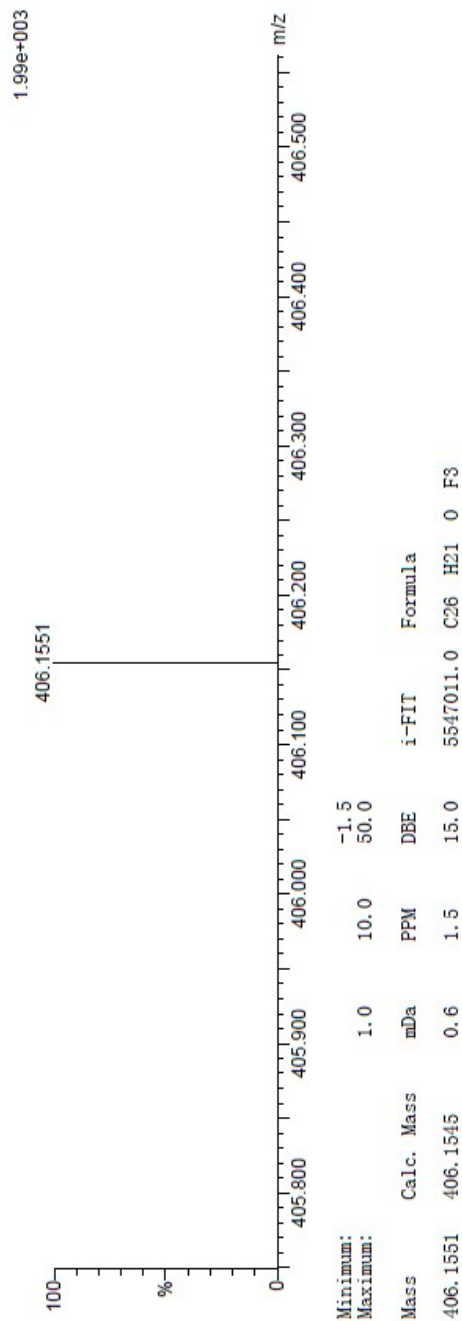



<sup>1</sup>H NMR Spectrum of (5-methyl-3-(4-tolyl)cyclopent-2-en-1-yl) (4-tolyl)methanone **3ai**

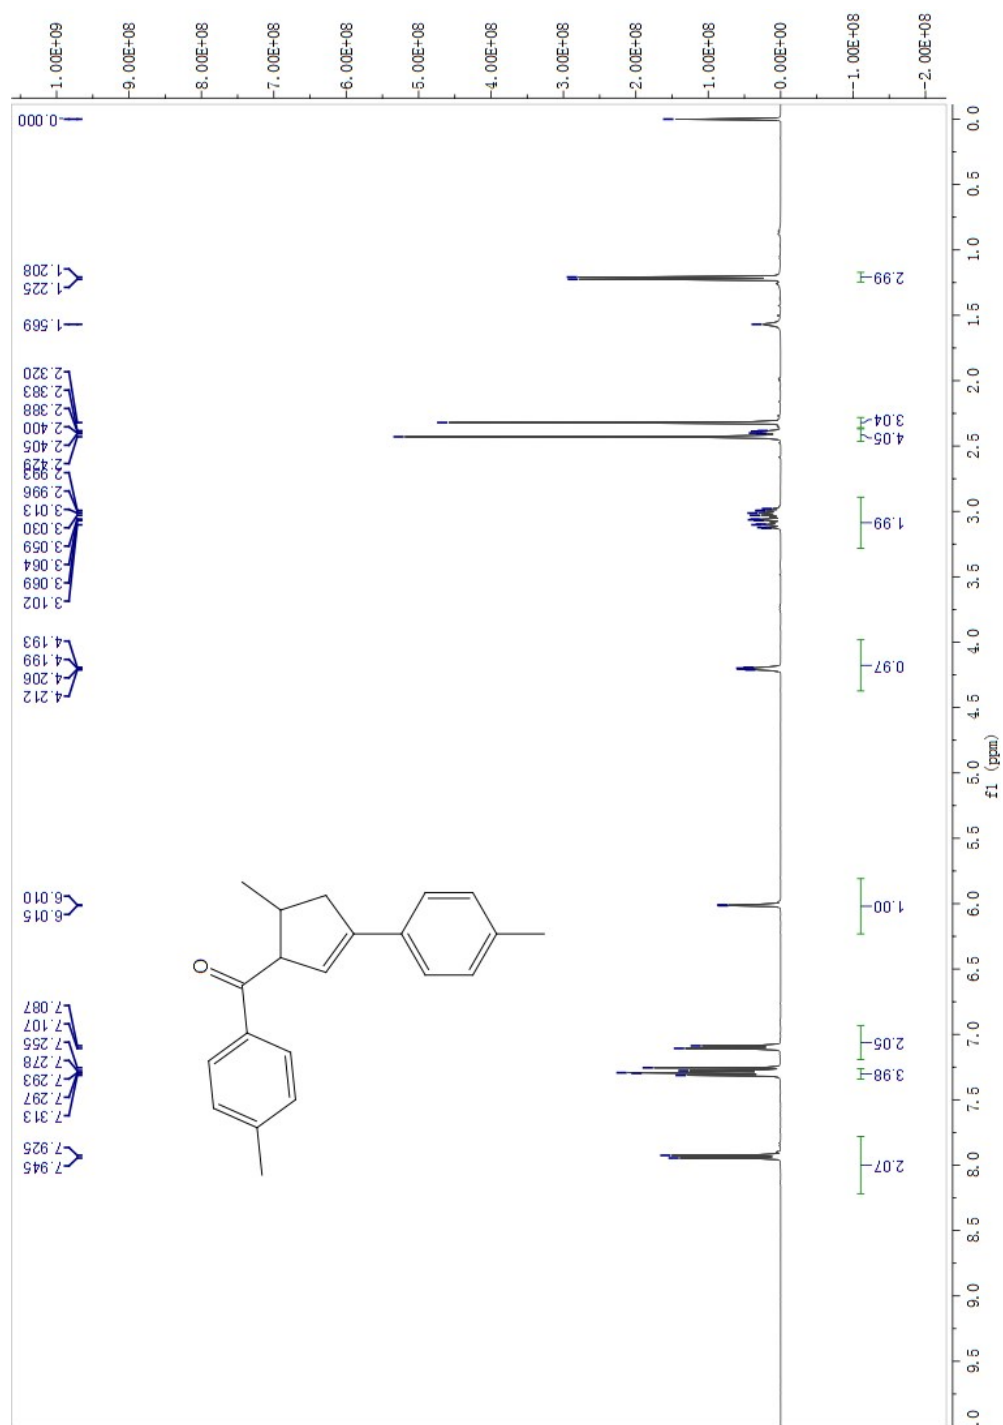

<sup>13</sup>C NMR Spectrum of (5-methyl-3-(4-tolyl)cyclopent-2-en-1-yl) (4-tolyl) methanone **3ai**

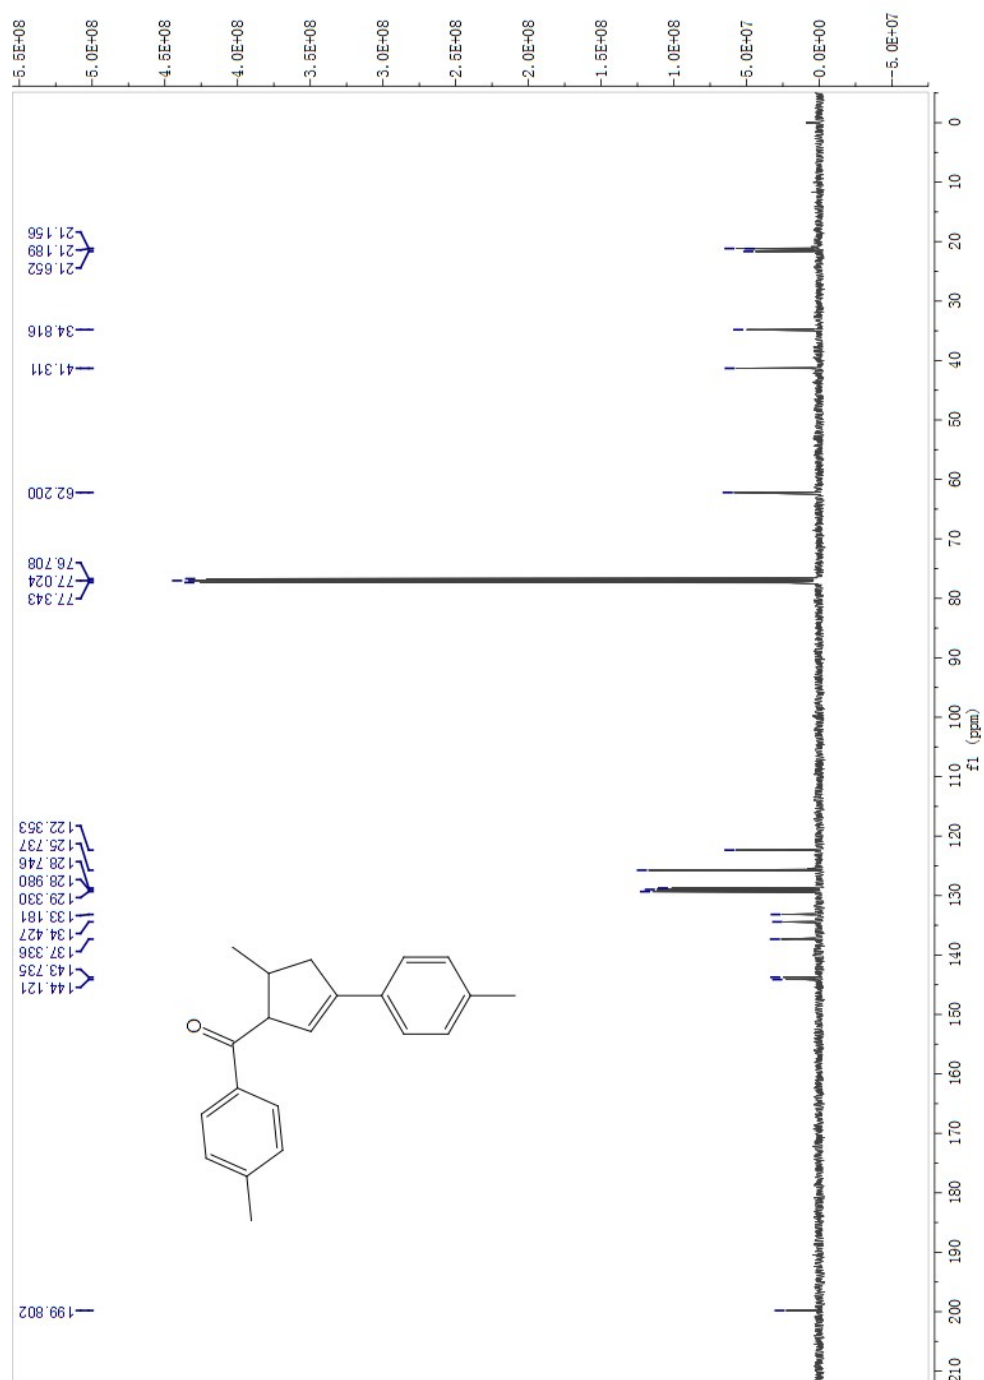

HR-MS Spectrum of (5-methyl-3-(4-tolyl)cyclopent-2-en-1-yl) (4-tolyl) methanone **3ai**

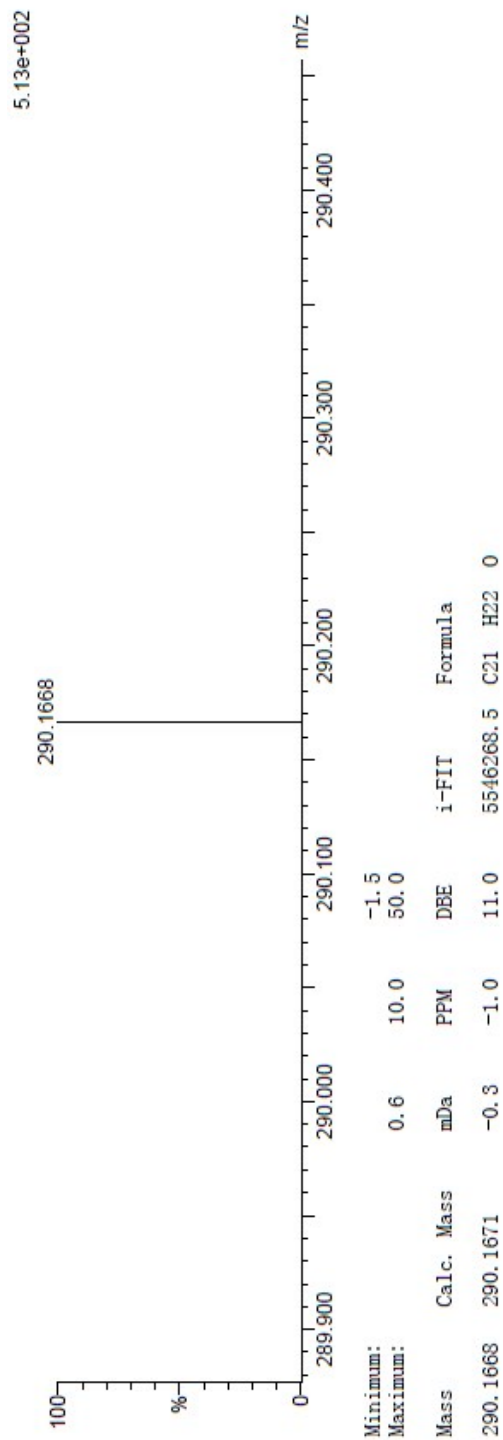

<sup>1</sup>H NMR Spectrum of (4-tolyl(3-(4-tolyl)cyclopent-2-en-1-yl) methanone  
**4a**

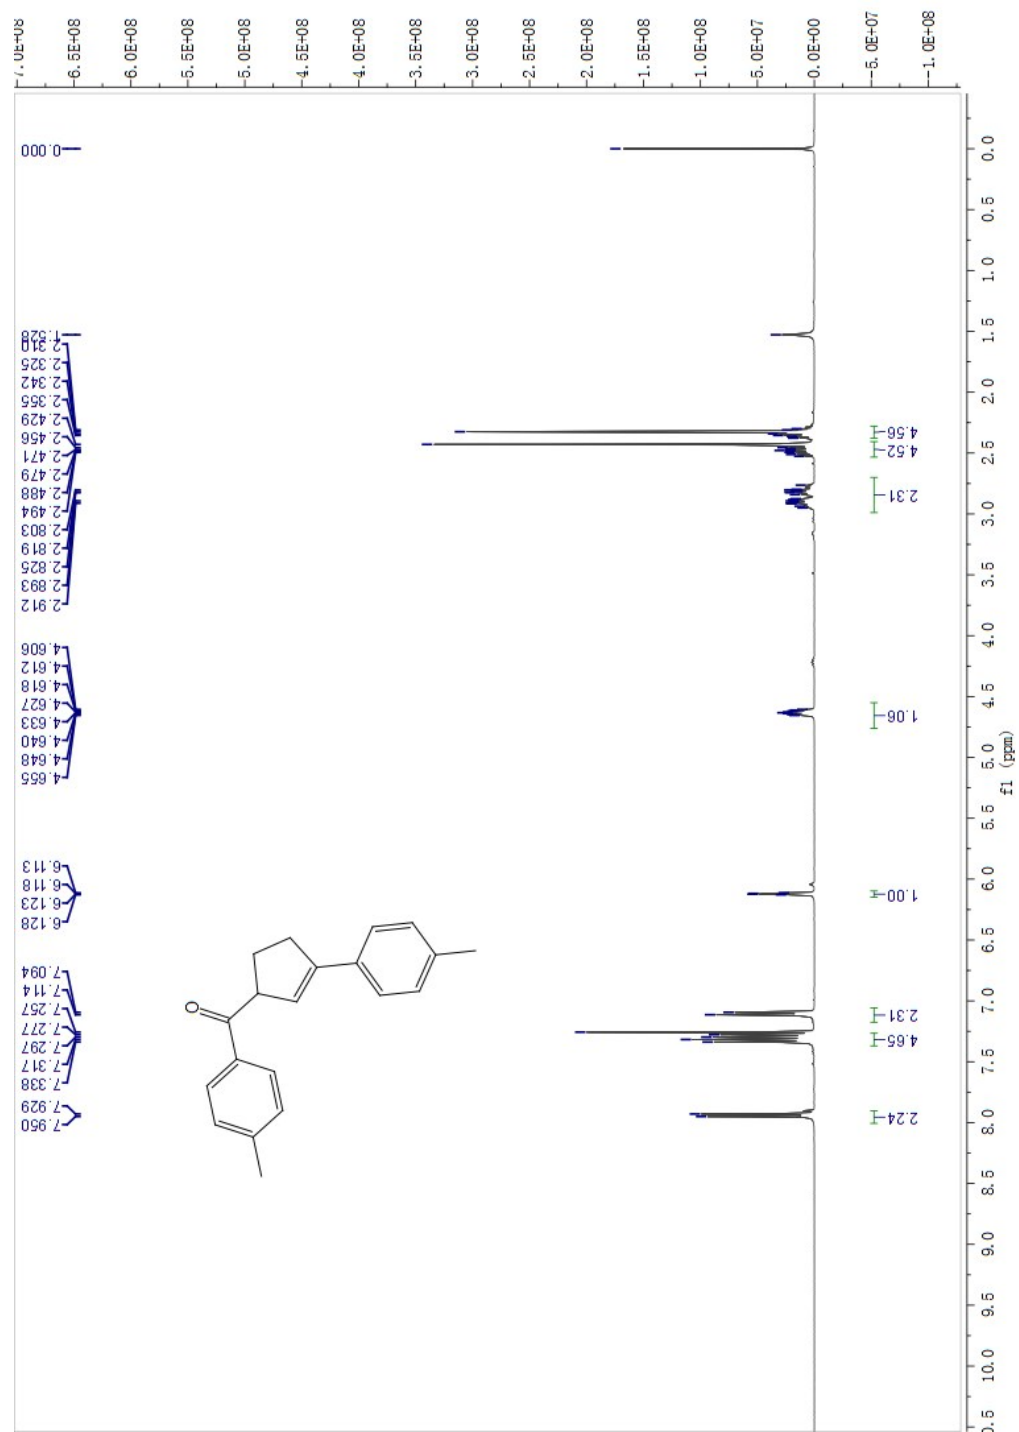

<sup>13</sup>C NMR Spectrum of (4-tolyl(3-(4-tolyl)cyclopent-2-en-1-yl)methanone

**4a**

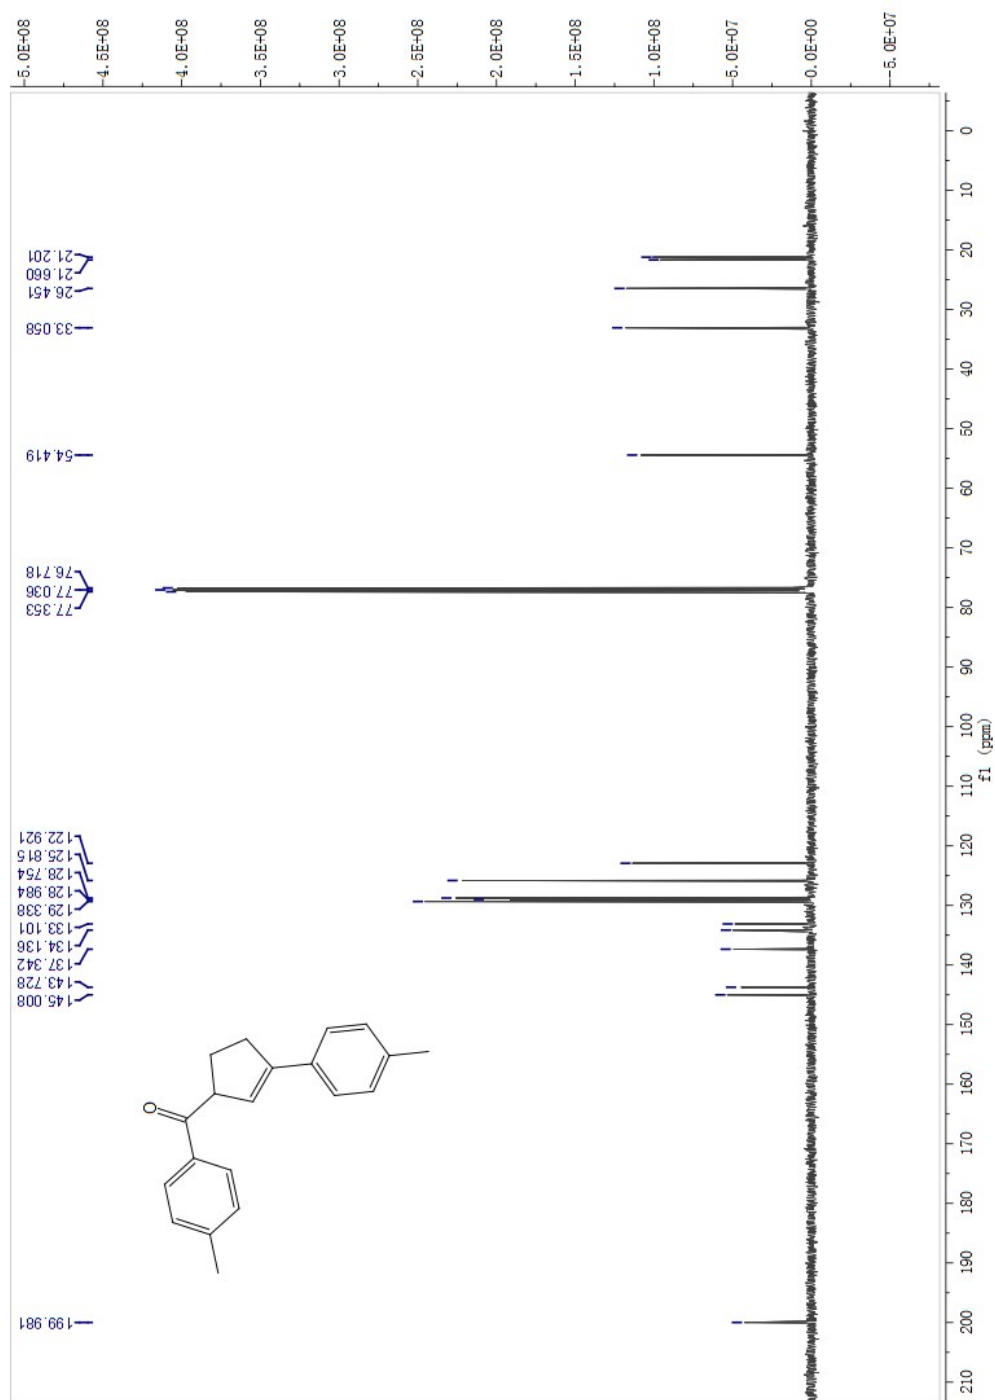

HR-MS Spectrum of (4-tolyl(3-(4-tolyl)cyclopent-2-en-1-yl)methanone  
4a

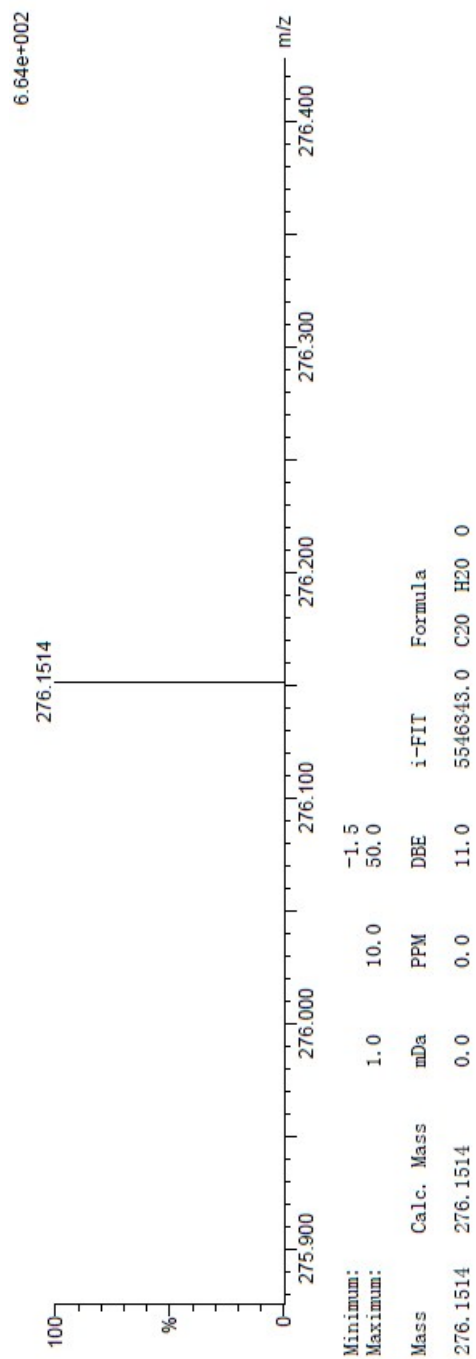

<sup>1</sup>H NMR Spectrum of (4-chlorophenyl)(3-(4-chlorophenyl) cyclopent-2-en-1-yl)methanone **4d**

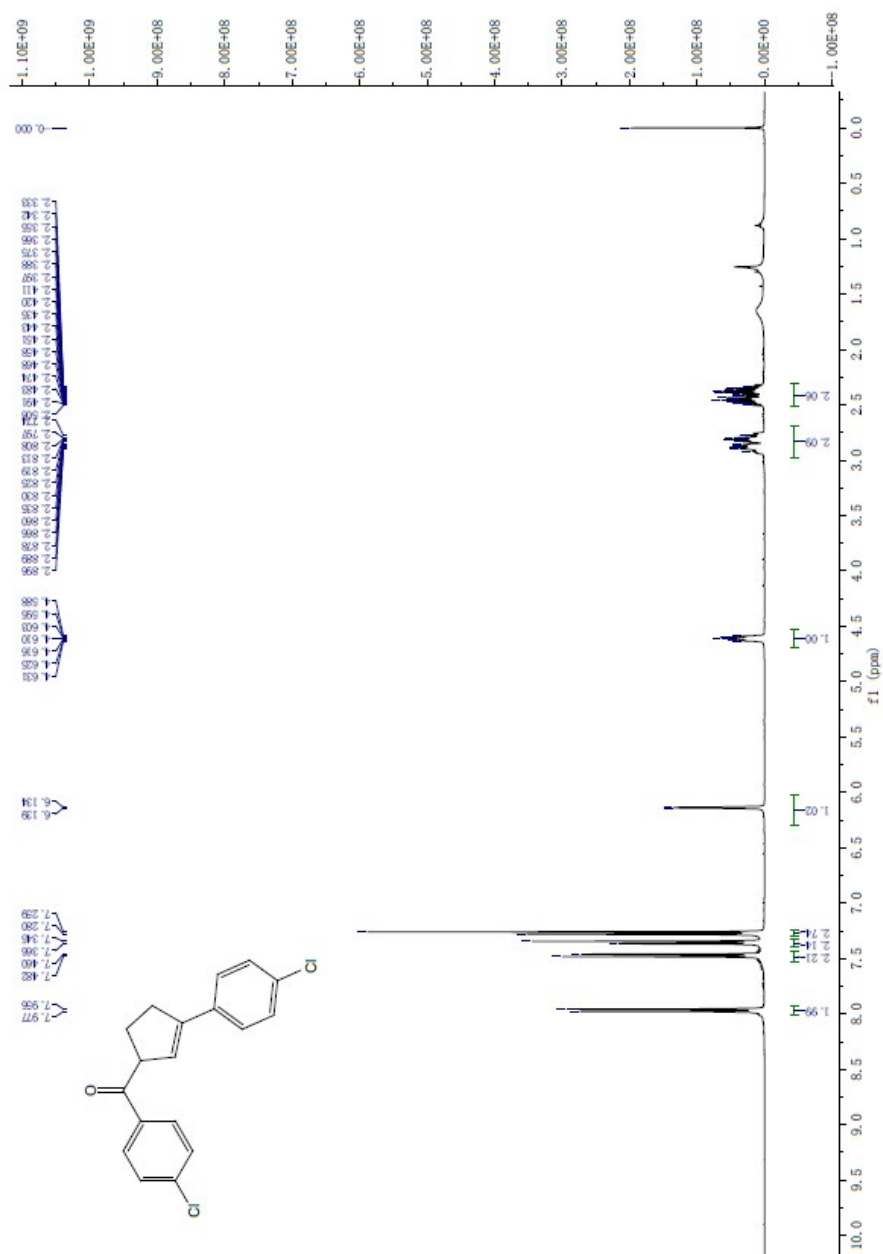

$^{13}\text{C}$  NMR Spectrum of (4-chlorophenyl)(3-(4-chlorophenyl) cyclopent-2-en-1-yl)methanone **4d**

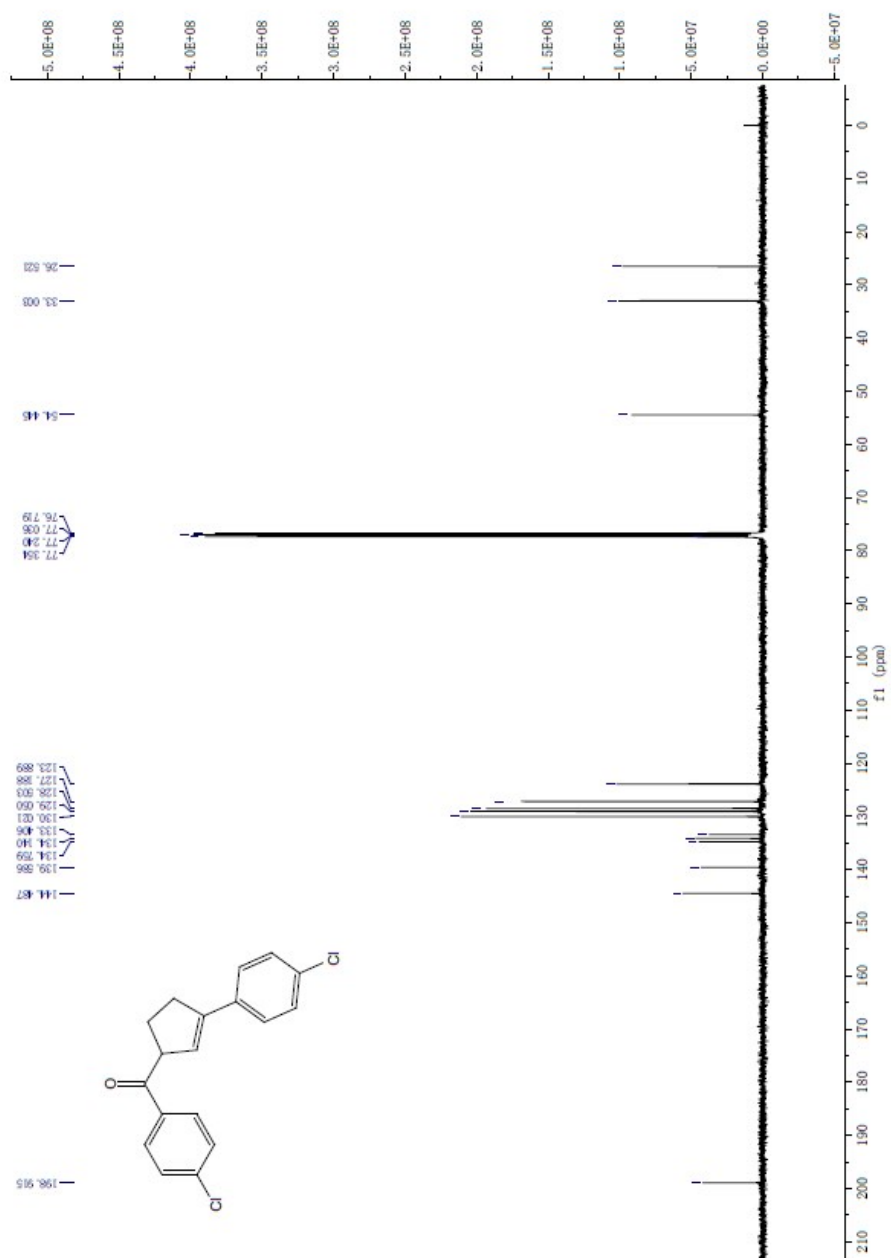



HR-MS Spectrum of (4-chlorophenyl)(3-(4-chlorophenyl) cyclopent-2-en-1-yl)methanone **4d**

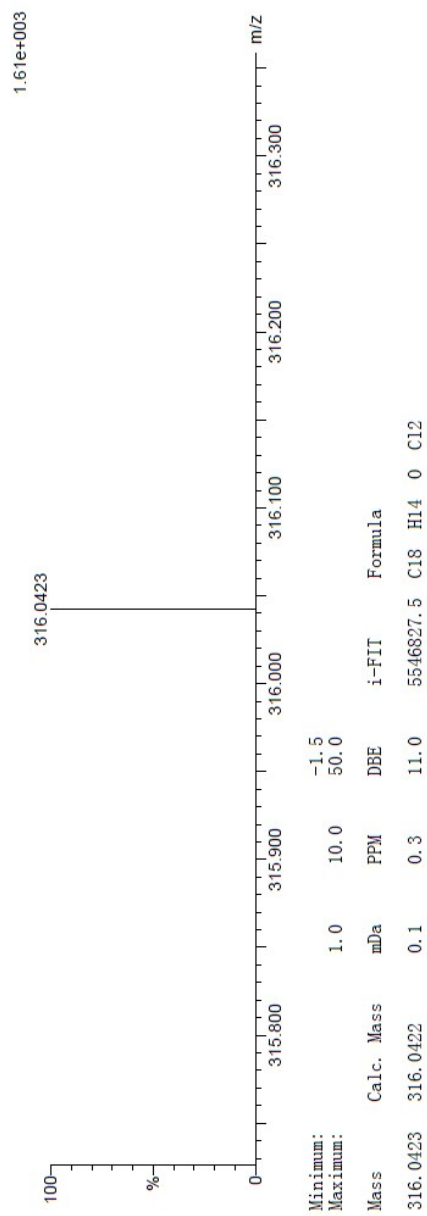

<sup>1</sup>H NMR Spectrum of naphthalen-2-yl(3-(naphthalen-2-yl) cyclopent-2-en-1-yl)methanone **4f**

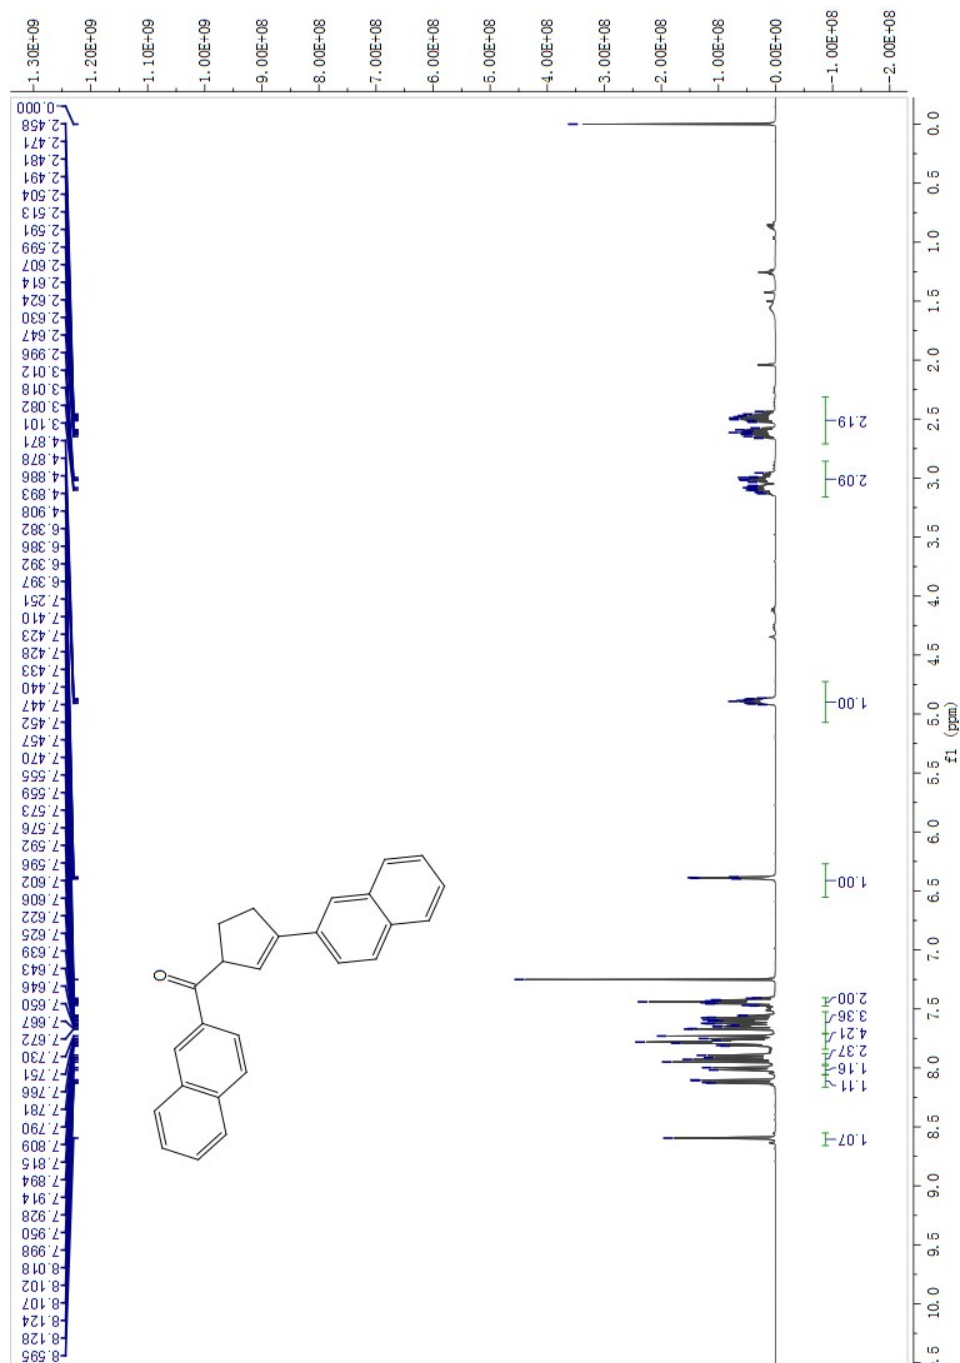

<sup>13</sup>C NMR Spectrum of naphthalen-2-yl(3-(naphthalen-2-yl) cyclopent-2-en-1-yl)methanone **4f**

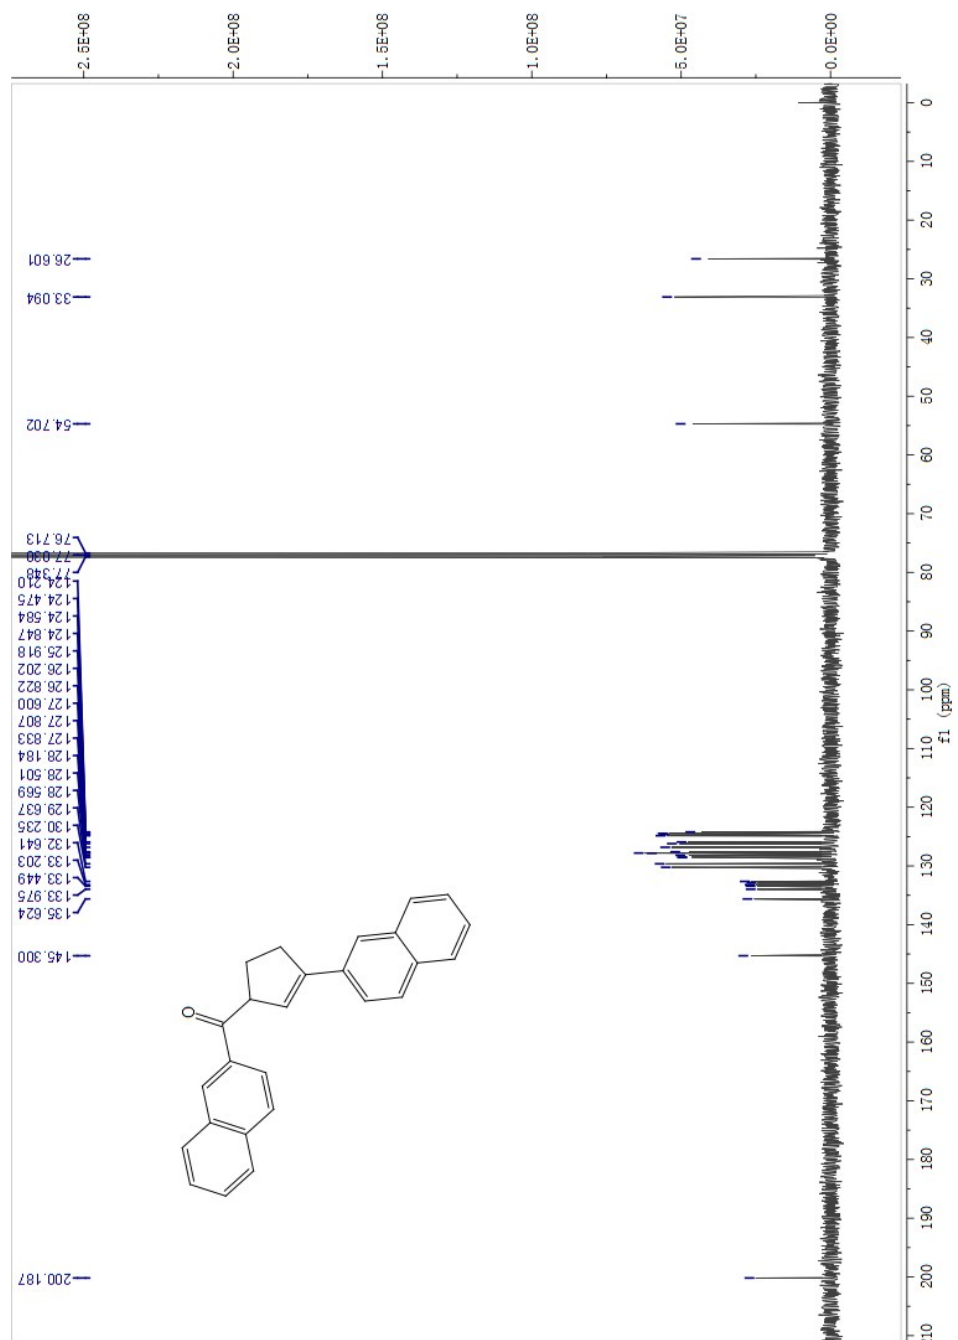

HR-MS Spectrum of naphthalen-2-yl(3-(naphthalen-2-yl) cyclopent-2-en-1-yl)methanone **4f**

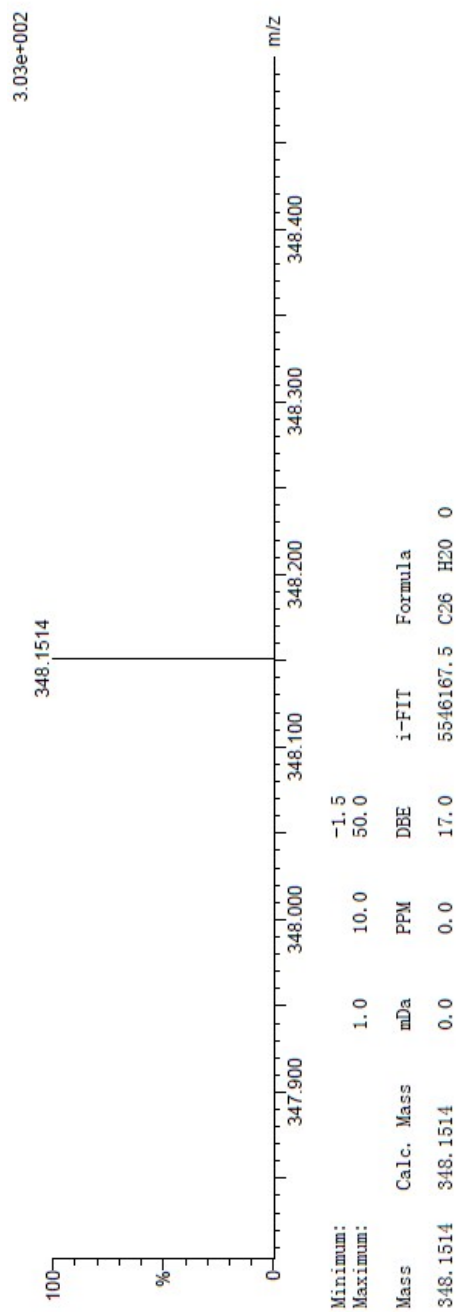

Supplement: d1ob00150g1.pdf [file d1ob00150g1.pdf]
